# Supplementary material
Source: publisher site journal article supplement (https://www.dovepress.com/get_supplementary_file.php?f=331378.xlsx)
Supplement: Supplementary file 1 [file get_supplementary_file.php]

## Sheet: FerrGeneExp
ID	TCGA-AA-3534-11A-01R-A32Z-07	TCGA-AZ-6598-11A-01R-1774-07	TCGA-A6-2678-11A-01R-A32Z-07	TCGA-AA-3514-11A-01R-A32Z-07	TCGA-A6-5667-11A-01R-1723-07	TCGA-AZ-6603-11A-02R-1839-07	TCGA-AA-3713-11A-01R-1723-07	TCGA-AA-3655-11A-01R-1723-07	TCGA-AF-5654-11A-11R-1660-07	TCGA-AF-2689-11A-01R-A32Z-07	TCGA-AA-3489-11A-01R-1839-07	TCGA-AA-3531-11A-01R-A32Z-07	TCGA-AA-3660-11A-01R-1723-07	TCGA-AA-3663-11A-01R-1723-07	TCGA-A6-2675-11A-01R-1723-07	TCGA-AA-3525-11A-01R-A32Z-07	TCGA-AA-3496-11A-01R-1839-07	TCGA-AG-3725-11A-01R-1736-07	TCGA-AG-3742-11A-01R-1660-07	TCGA-AF-2692-11A-01R-A32Z-07	TCGA-AF-3400-11A-01R-A32Z-07	TCGA-A6-2683-11A-01R-A32Z-07	TCGA-AZ-6601-11A-01R-1774-07	TCGA-AF-2691-11A-01R-A32Z-07	TCGA-A6-2679-11A-01R-A32Z-07	TCGA-A6-5662-11A-01R-1653-07	TCGA-AA-3511-11A-01R-1839-07	TCGA-AG-3731-11A-01R-1736-07	TCGA-AG-3732-11A-01R-1660-07	TCGA-AA-3518-11A-01R-1672-07	TCGA-A6-2671-11A-01R-A32Z-07	TCGA-AA-3527-11A-01R-A32Z-07	TCGA-AZ-6600-11A-01R-1774-07	TCGA-AA-3517-11A-01R-A32Z-07	TCGA-A6-5659-11A-01R-1653-07	TCGA-AZ-6605-11A-01R-1839-07	TCGA-A6-2680-11A-01R-A32Z-07	TCGA-AA-3516-11A-01R-A32Z-07	TCGA-A6-2686-11A-01R-A32Z-07	TCGA-F4-6704-11A-01R-1839-07	TCGA-A6-5665-11A-01R-1653-07	TCGA-A6-2684-11A-01R-A32Z-07	TCGA-AH-6643-11A-01R-1830-07	TCGA-AZ-6599-11A-01R-1774-07	TCGA-AA-3712-11A-01R-1723-07	TCGA-AA-3697-11A-01R-1723-07	TCGA-A6-2682-11A-01R-A32Z-07	TCGA-AA-3522-11A-01R-A32Z-07	TCGA-AA-3662-11A-01R-1723-07
RPL8	714.836	679.194	611.998	525.593	608.366	618.08	1145.36	1035.54	492.833	635.242	1095.34	388.019	967.468	617.321	459.692	606.8	698.814	1661.46	961.592	572.465	655.699	653.036	506.741	611.804	566.837	595.188	729.036	836.757	501.706	709.76	682.119	568.128	725.089	710.045	429.922	457.631	484.868	385.997	558.336	625.295	378.822	946.999	464.29	620.883	603.917	688.386	742.447	709.195	949.707
IREB2	5.71096	4.67945	6.26741	6.55743	5.44388	4.94987	4.69606	5.21029	7.07141	4.91661	4.69539	6.28788	5.25741	5.38118	4.66448	6.59697	5.73266	4.0519	6.29654	5.53111	5.39731	6.75637	5.95522	5.19965	4.95178	5.66154	6.17435	5.91	7.38086	5.30544	5.02289	5.78027	5.25074	4.78524	6.66733	3.51388	6.37022	4.69817	5.50856	6.0388	6.16147	4.52098	6.57184	6.862	6.67628	5.80167	5.23143	6.21556	5.74965
ATP5MC3	53.0132	53.0825	53.2107	78.6526	55.7923	42.4799	125.542	82.0445	68.2908	52.3924	77.908	51.4474	66.083	51.3749	37.3702	72.2303	54.7811	121.207	67.5295	51.154	74.8235	62.7828	47.7792	55.5386	58.822	50.4378	55.0916	70.4416	36.1967	55.133	57.9013	58.3973	60.4242	53.206	66.8272	30.642	47.7501	43.5508	65.9825	58.7333	55.4368	76.7879	42.782	44.7347	52.69	75.267	57.9186	58.5684	55.1919
CS	44.093	40.8163	47.5327	49.6192	42.208	30.8196	34.9802	34.0626	51.5467	33.6179	24.3085	35.0867	29.5129	42.4874	32.1838	41.2919	34.657	19.4224	24.7742	38.3622	51.6685	47.9258	42.1101	37.3949	38.6719	34.6819	39.4602	33.066	33.6832	39.367	39.4018	43.5806	48.2424	35.9993	39.2647	27.1196	28.2445	27.114	47.2818	41.1286	35.8338	41.7704	33.2542	43.0649	36.1859	43.1674	40.4465	49.249	34.5505
EMC2	5.95272	6.46221	7.23205	7.17749	7.51235	8.36982	7.72372	8.84127	9.28471	7.15261	12.3973	6.46235	8.7958	7.53819	6.20568	7.78658	9.28268	7.94019	12.2933	7.7006	6.47208	6.91997	6.36626	6.44714	6.13199	8.84402	7.18979	9.56878	10.2576	5.878	6.05115	6.68314	7.5365	6.89595	9.07077	6.25354	6.78205	5.65025	6.68429	8.43944	7.27559	6.20158	9.10528	6.84107	6.4329	8.81163	6.59922	6.87836	8.82932
ACSF2	19.7752	13.8202	21.4652	14.8762	17.4067	4.20179	21.6816	17.2304	12.1915	6.83674	4.48391	18.8407	15.4645	20.4075	5.36138	21.8889	9.50513	10.6284	6.00648	6.94518	10.2579	18.5837	10.8013	7.13627	18.5418	13.114	12.1482	9.57775	6.88572	19.1625	15.8534	17.6636	13.4928	18.9949	14.9308	2.92454	18.5601	15.7815	20.3277	4.74628	21.9612	27.8651	13.9872	14.4428	19.6157	5.10649	21.6293	23.9312	12.9039
NOX1	53.559	46.5482	53.1807	35.3096	65.6056	39.8828	6.93844	43.3518	61.5596	49.7904	50.4602	30.2636	68.3679	33.0485	38.0747	49.5938	28.9315	60.2763	38.2458	40.5441	82.1371	36.3408	54.1755	40.0711	34.2524	35.6571	49.7085	58.2211	36.1648	47.4899	58.2026	54.1111	60.743	37.7097	45.0544	4.19587	2.76864	29.6537	25.4017	52.9878	26.177	47.3559	38.0237	45.3513	42.7899	55.0664	38.6291	36.6904	45.7836
CYBB	16.3565	5.2998	10.6882	21.8502	9.46543	27.9127	9.52378	11.8516	5.47562	10.8193	27.3329	8.08023	9.68098	16.3013	5.706	18.616	21.337	10.9312	14.788	11.553	4.22229	11.8535	7.75802	9.39817	16.6605	10.5458	14.0733	17.6364	16.3481	10.1583	6.731	16.7096	5.76022	13.7795	9.75699	6.44099	4.28053	6.56341	9.42364	7.34748	9.02128	9.83636	18.5911	11.4156	14.1984	18.1431	11.2786	13.1302	13.622
NOX3	0	0	0	0	0	0	0	0.0109283	0.0126039	0	0.0117537	0.0217956	0	0.0127469	0	0.0112288	0	0.0232814	0.0115136	0.0225848	0	0	0	0.00812637	0.0104358	0.0116305	0.0104825	0.00840499	0.0123252	0	0.0171321	0	0	0	0.0199	0.0100514	0	0.00834298	0.00790845	0	0	0	0	0	0	0	0	0	0
NOX4	0.00703263	0.034445	0.0399738	0.00912875	0.0140876	0.0887075	0.0290338	0.0585712	0.0253319	0.106765	0.0905554	0.0146019	0.0367995	0.0683179	0.0194004	0	0.279385	0.0662885	0.200552	0.100871	0.00720262	0.00812891	0.0620968	0.068053	0.00699141	0.101294	0.0210681	0.160481	0.177531	0.0599221	0.0459105	0.0142773	0.0371316	0.011585	0.0199979	0.276089	0.0806039	0.0111787	0.0741755	0.0482573	0	0.00993068	0.0875902	0.0484744	0.0187851	0.0402091	0.00881504	0.00965216	0.0295789
NOX5	0.0171333	0.00610303	0.0111299	0	0.00514816	0.0206718	0.0222307	0.0196205	0.0164573	0.0150588	0.019184	0.00948641	0	0.0062415	0.0434831	0.00916361	0.0106769	0.0151996	0.0206714	0.0380909	0.0233966	0.00660137	0.0160183	0.00663178	0.0255493	0.0170846	0.0650146	0.0288085	0.0201167	0.00307338	0.00838873	0.0104349	0.0201027	0.00225791	0.03248	0.0114838	0.0184098	0.019064	0.00903553	0.00968201	0.0227265	0.00483874	0.0182908	0.0110223	0.0421041	0.00753536	0.0157488	0.0117576	0.022648
DUOX1	0.473415	0.517205	0.342804	0.280863	0.232196	0.580824	0.0690829	0.195617	0.260771	0.165736	0.341546	0.229694	0.150038	0.278545	0.446993	0.462029	0.235709	0.113656	0.14721	0.344766	0.258258	0.191807	0.41827	0.268255	0.349341	0.205483	0.292421	0.312623	0.383939	0.267021	0.22303	0.477249	0.297774	0.265314	0.240558	0.278058	0.211516	0.176492	0.196716	0.260041	0.148359	0.215943	0.269198	0.587591	0.414566	1.6013	0.238584	0.244495	0.348967
DUOX2	15.3039	16.7206	0.456648	9.70677	1.70071	36.4385	0.131127	0.467462	10.7356	2.40869	23.347	13.8399	2.02739	0.561132	4.27407	28.1474	4.92057	0.592203	1.47271	2.12598	3.42453	4.61575	5.16941	7.07871	14.6182	2.20251	7.74018	19.7181	0.371097	1.69108	3.26572	19.8484	0.478253	1.08583	15.5039	0.315157	0.0858783	11.1046	2.23499	3.61787	0.510797	2.46648	3.16987	21.1503	2.75979	137.748	2.44985	0.426309	4.19625
G6PD	11.4546	10.7667	8.88353	11.4378	10.043	12.697	7.58053	8.91061	11.3871	8.82918	8.26353	9.22772	8.00638	10.3794	9.13848	11.4924	8.7786	4.76816	5.41339	8.68317	12.0274	9.98915	10.2481	9.5833	12.7319	7.63901	10.6593	9.22701	6.35139	9.08146	10.3093	11.3418	8.70672	10.0763	6.91323	7.70305	7.23662	8.38269	9.35244	10.7961	7.979	9.97804	8.28801	12.2906	8.3732	13.1665	11.3008	9.43908	7.86174
PGD	36.4388	41.7559	29.2658	35.6045	34.8971	42.4806	36.5455	33.4885	49.331	33.1979	40.6303	24.009	29.4499	28.9954	27.0182	34.6721	29.6679	28.7231	26.4834	32.5388	47.1146	37.6415	33.8662	38.4975	36.2252	22.4123	40.566	39.1983	19.8137	30.1801	28.5025	36.4208	37.8445	31.425	30.0178	12.8713	34.6912	20.1208	34.4597	46.2543	24.4212	31.6498	23.3173	41.9837	28.7173	39.9858	33.5355	35.9217	33.914
VDAC2	36.9339	28.1436	39.1398	59.015	38.6634	26.1561	50.1572	35.3324	45.5294	45.5113	38.8585	47.0519	33.8538	37.2345	35.1907	43.125	34.7177	31.405	42.9715	40.4465	46.6614	42.5949	31.3804	56.374	46.9916	38.8543	28.3257	32.3589	35.059	34.2822	39.8781	39.5457	37.1519	35.7831	48.3259	29.9052	35.3975	51.8865	55.4335	38.802	46.718	45.9973	31.4612	28.3409	34.1476	58.7393	38.4855	43.1202	34.2147
PIK3CA	1.90644	2.40968	2.2712	1.97697	1.87068	2.87553	1.37827	1.93967	2.00734	2.57337	2.50187	1.88223	1.41234	2.46158	3.09139	1.71768	2.77846	1.46244	3.22272	2.98765	1.8351	2.20099	2.57666	2.31163	1.67109	2.49835	2.26084	2.73192	4.68541	1.86923	1.84194	2.20877	2.09253	1.98411	2.26258	3.28668	1.5076	1.58036	1.80864	2.27638	2.08719	1.53954	3.25561	2.55591	1.85442	1.80716	1.91474	2.06636	2.39224
FLT3	0.670019	0.243257	0.891421	0.303288	0.320056	0.293963	0.243177	0.354131	0.278474	0.675374	0.253919	0.199757	0.424765	0.506939	0.238861	0.650551	0.353298	0.262908	0.412669	0.510083	0.154838	0.508367	0.235575	0.375052	0.809557	0.376885	0.694807	0.536472	0.447809	0.300471	0.264965	0.383657	0.260032	0.526395	0.283346	0.192467	0.180908	0.221198	0.376643	0.349502	0.244975	0.218336	0.427947	0.0852608	0.666323	0.335482	0.452219	0.350151	0.464517
SCP2	30.6885	24.851	32.177	29.1411	28.3693	20.1283	34.8866	34.7135	41.7187	24.4876	26.264	31.2127	38.2077	26.6904	21.0982	29.2544	27.0736	37.7004	38.8516	24.3576	32.7819	38.6426	24.6936	26.1009	26.3851	30.1551	27.944	32.5012	29.8441	32.9739	26.8981	30.5258	27.5035	28.2657	38.3361	12.5917	48.3208	28.7249	35.7982	27.2142	30.5586	30.6514	28.6224	30.2462	30.037	25.6955	29.1771	34.1826	31.7979
TP53	24.1149	22.4885	21.6599	17.018	20.6623	17.4603	15.6614	22.1229	17.2889	13.8594	13.9946	11.5978	20.1903	19.5086	14.3444	20.0048	13.8296	12.483	10.8296	16.1968	28.8736	21.2224	22.4312	16.0923	20.1837	15.9114	26.49	18.9944	14.675	20.3148	18.7451	18.2427	23.3294	19.9808	15.3933	9.28208	8.64111	9.21505	17.5605	16.8517	11.5642	19.2819	15.3035	23.0534	16.6301	16.3975	20.6563	22.5245	17.6242
ACSL4	4.73819	3.46068	4.51219	4.46753	2.81463	7.81757	6.75563	4.68228	3.93981	5.47593	10.3637	2.32651	3.55816	5.3803	7.65078	5.06479	8.56341	5.21353	10.1117	8.18841	2.69671	4.44427	5.30039	8.10948	4.88979	6.06416	4.52129	6.25519	10.7342	3.96498	3.04302	5.02217	6.07297	3.74521	4.71919	6.04388	3.07819	2.54683	4.23425	4.96072	2.77756	2.52278	6.08009	6.95872	4.11644	5.92543	4.34192	3.5932	5.14377
LPCAT3	11.1147	7.28403	11.0439	13.6188	7.76993	4.69232	11.5746	8.08086	7.01031	5.13276	6.63904	11.7837	8.26697	9.80017	5.29625	10.3849	7.85924	6.06205	4.91115	5.51792	9.16243	11.8999	7.68159	6.38124	9.5071	6.94138	9.54967	7.7079	5.0922	13.0245	8.13327	13.2992	11.9285	10.6	11.765	2.22841	15.8815	11.0655	13.8967	6.0575	16.087	16.4892	7.55521	8.91399	8.63763	7.56195	10.0915	11.1515	8.35736
NRAS	21.3246	16.6088	22.9925	25.4333	18.6948	13.0742	35.4117	23.7201	29.4222	16.6153	20.9099	22.9186	23.7238	17.7389	15.6623	23.6249	18.6302	27.8041	24.2348	18.7901	24.0343	25.228	16.5815	23.9754	18.5461	20.979	19.5673	19.2423	15.998	20.9411	21.1405	22.8851	25.2014	21.9882	27.1727	5.43916	17.7537	22.1331	24.6864	17.6935	24.8712	21.8437	20.5627	20.3199	23.2065	21.3088	22.8522	23.0452	19.616
KRAS	11.1287	9.09474	10.8291	12.6611	11.4375	7.87897	10.0175	11.7904	15.4099	11.0077	10.86	14.0655	14.2971	9.91331	11.8718	12.347	10.4136	9.72036	13.1786	12.1432	14.6057	11.1409	12.5546	12.1444	10.1705	11.234	12.8543	13.5574	12.4186	10.7344	11.5104	12.7794	15.9093	11.1571	15.7045	6.45653	7.57869	9.54242	11.0425	13.8066	13.4014	9.31579	13.9736	11.9166	11.5957	11.9993	11.262	12.6893	12.3433
HRAS	11.0068	13.426	8.58081	10.9457	10.5495	13.2267	12.1648	13.541	12.6326	12.6746	11.6899	14.4675	9.7857	13.2392	11.1886	13.8515	12.3204	9.38503	10.2844	10.6714	14.6752	8.82026	14.1482	13.4167	10.8043	10.8884	8.68215	7.8872	8.0907	11.0334	14.7747	11.204	13.5927	12.4636	9.81921	9.96353	10.3112	12.7359	11.2103	13.0577	11.681	11.929	9.05139	8.76618	9.98137	16.2108	11.2362	10.8936	9.9896
TF	0.117626	0.080233	0.10161	0.0498122	0.10528	0.601166	0.0354246	0.190197	0.0360591	0.261959	0.661327	0.460742	0.0458351	0.592607	0.146364	0.176687	0.327514	0.124888	0.279989	0.265635	0.0495547	0.0539991	0.24438	0.25574	0.0945444	0.329969	0.407361	0.280539	0.320294	0.0897865	0.108239	0.0541953	0.0675378	0.0725595	0.137588	0.555957	0.222303	0.274491	0.12067	0.117182	0.110656	0.040052	0.519507	0.0713018	0.082894	0.0814518	0.135936	0.0446535	0.105261
TFRC	45.1593	31.0425	58.3589	35.3965	42.0843	18.7447	51.6234	19.7126	98.8761	50.5654	29.0253	29.041	18.0044	38.6394	24.3097	38.4101	38.1327	18.9813	20.5478	21.6138	50.1515	94.3054	18.8143	29.7607	27.5917	19.2146	24.2115	20.747	11.4943	35.521	31.9609	36.1457	49.4719	20.027	68.597	5.59249	19.6674	30.5929	74.0027	32.2351	55.1634	37.5746	23.695	39.3001	33.4293	29.4455	35.2997	38.1316	15.5854
TFR2	0.232764	0.309038	0.106531	0.15748	0.224657	0.185677	0.119807	0.149799	0.132116	0.101445	0.0852952	0.131806	0.155016	0.169588	0.0653782	0.37574	0.0988984	0.164257	0.0557019	0.0910527	0.118473	0.16306	0.127492	0.104839	0.2314	0.0797119	0.15214	0.0948793	0.104349	0.094894	0.0725231	0.157515	0.114208	0.172895	0.0722057	0.0243138	0.115201	0.0639074	0.149853	0.19474	0.0982387	0.151393	0.110439	0.221698	0.158262	0.223356	0.166214	0.121977	0.132228
SLC38A1	24.3827	20.909	25.2057	23.7413	19.7674	20.936	12.1183	15.8493	30.4811	20.6793	13.2072	20.1639	13.6384	19.5706	26.3736	22.1622	19.2532	7.32452	18.5763	26.9479	27.6771	26.9944	26.5872	27.654	18.099	21.9686	22.5444	16.7123	29.0281	23.2396	20.0541	25.0544	29.6155	21.6597	31.7377	17.4261	8.10452	18.074	25.9224	25.7088	23.337	14.9344	24.0654	24.3403	18.0204	21.4794	22.6554	22.3211	15.404
SLC1A5	47.5993	33.7491	38.2121	28.3311	36.8242	41.3424	26.3315	33.0984	56.3561	35.9715	20.9037	34.5866	37.5258	32.3724	29.4596	30.3062	29.6964	22.5504	18.8044	32.3695	61.0773	44.1206	33.3674	49.0052	35.4822	27.5343	46.9219	29.7828	17.7884	36.8297	51.704	36.2556	54.6714	42.8903	28.4523	9.41236	11.1015	26.5771	40.2467	60.7268	29.376	33.0606	24.1976	41.0377	51.2976	46.4584	57.9565	39.9445	49.8172
GLS2	0.0465876	0.092194	0.0378294	0.0134385	0.0518463	0.0510993	0.042741	0.0377226	0.031076	0.0413603	0.0637557	0.0250782	0.0609445	0.0565714	0.0685426	0.0609082	0.040322	0.0803632	0.039743	0.0668218	0.0353434	0.0279221	0.0483952	0.0561016	0.0308763	0.0401464	0.0827054	0.0787483	0.0547	0.0464273	0.0126722	0.0315266	0.0546618	0.047752	0.0294391	0.0446085	0.0148322	0.0123422	0.038998	0.0626824	0.0228875	0.0487301	0.0429807	0.0428157	0.0553074	0.0546389	0.0346045	0.0568361	0.0684253
GOT1	43.2158	48.3755	47.9806	57.1182	52.8944	31.3291	66.1002	47.4483	59.703	41.3698	36.5264	41.3914	39.7945	45.9268	30.903	43.6165	39.0156	41.6568	34.5291	34.6013	66.8932	50.4533	48.6497	37.5283	45.4943	36.6431	45.3094	38.7866	24.6282	43.7571	46.277	46.6469	55.6548	36.9366	48.5651	20.5418	31.0902	29.4622	53.6703	48.4369	38.1904	50.323	34.9295	46.1536	45.0781	56.4327	48.2387	51.0356	41.4546
CARS1	4.65143	4.84969	4.14463	5.93063	5.49305	5.98266	4.39585	5.15814	6.56186	5.11925	4.91405	6.1311	4.76061	4.62129	4.73435	6.57926	4.91422	4.14447	4.50447	4.34517	6.20308	4.69355	5.22015	5.99647	4.99359	4.10771	5.22281	4.6306	4.27032	4.4956	5.26831	5.39358	4.9464	4.24984	4.17815	3.87308	5.00871	4.61681	4.7448	6.45493	4.74263	4.09333	4.94743	4.29447	5.10219	6.75338	4.80418	4.34834	5.13538
ALOX5	6.95934	3.21387	6.01967	4.16745	4.59321	8.3708	4.79928	3.5717	1.83541	4.10964	4.93535	2.35858	2.47334	7.55752	1.79458	7.52421	5.80155	2.09663	2.96249	3.43311	1.45965	6.51861	3.31918	3.75924	6.21584	4.3997	9.43436	5.31914	2.28739	4.53578	3.18418	4.88061	6.17637	5.35817	4.51024	1.40868	8.92486	3.34333	4.86637	3.78101	3.46203	3.97091	6.78259	9.79718	7.19013	7.0921	7.13125	6.29804	4.27475
KEAP1	23.6924	20.652	21.1497	25.1981	19.8084	21.2484	19.7179	24.3389	13.8848	20.6293	21.9335	20.0424	21.9648	21.143	18.9613	24.5875	19.3123	16.4515	18.6724	17.7312	23.586	20.6024	19.8102	19.5899	25.5366	15.7614	17.8822	19.9558	17.5193	21.5719	22.8776	23.1027	22.0343	21.0269	16.304	14.8711	14.612	19.7497	20.6533	18.8413	17.4132	24.7182	15.9547	22.0623	18.1347	23.9886	23.4225	22.4344	22.1496
HMOX1	40.3664	15.9219	34.0805	45.4986	28.1827	31.4788	26.3882	26.5282	17.5398	27.6031	13.5225	54.0619	27.5632	48.0971	19.3255	41.692	22.3835	20.3505	17.5672	11.9083	25.3402	52.2118	20.4525	17.3806	41.769	26.9194	20.5508	21.509	15.8752	38.2192	26.4888	39.3132	13.5426	46.3491	47.0226	6.30681	68.29	68.3297	50.9317	7.87877	57.5066	63.4909	31.4735	22.3294	30.1403	42.8686	30.0299	39.0714	23.7026
ATG5	13.5076	10.7395	13.7511	13.6553	13.3282	10.4026	29.2628	20.0067	15.7822	12.7902	20.941	12.7564	19.4934	11.826	11.3268	13.6485	14.7416	32.7781	25.6282	11.8727	14.4802	14.8925	11.266	11.4055	12.0915	14.5573	13.9976	16.1731	14.8793	13.0586	12.2572	13.4012	12.4257	12.738	16.5606	9.10716	13.743	13.5843	13.7837	12.5899	12.0539	13.4459	14.6202	12.5885	14.4671	15.6974	13.1135	14.8215	19.1384
ATG7	2.8757	2.37286	2.94989	3.06395	2.6688	2.99715	2.88825	3.06452	2.53205	2.73595	3.10849	2.45048	2.77143	2.73169	2.27612	2.89178	2.79392	3.05168	2.68566	2.46263	2.79525	2.8948	2.16294	2.82548	2.94569	2.32574	2.9613	3.05836	2.33074	2.68805	2.70705	2.85418	2.6651	2.95344	2.49344	1.75669	1.90699	2.36461	2.78079	2.52329	2.36057	3.08181	2.27405	2.84137	2.84178	3.20191	3.05397	3.22908	3.02121
NCOA4	80.3554	53.7331	83.1626	84.7353	64.7034	60.8102	124.519	93.3274	77.874	62.6476	72.8153	70.7953	77.2561	76.5878	66.5227	76.9103	75.9261	86.9868	103.876	74.9303	82.2169	85.1125	66.7961	73.4507	79.9366	75.2542	70.2399	75.3589	89.7511	82.888	71.0697	90.9746	71.0059	81.1034	88.3845	57.9014	110.591	81.7529	90.358	63.6691	81.9859	83.8926	68.4369	67.9816	80.2974	78.2766	78.5606	85.0859	82.0385
ALOX12	0.737459	0.715099	0.525632	0.333269	0.54987	0.754952	0.212636	0.656844	0.501757	0.399375	0.293592	0.448016	0.675305	0.487549	0.488248	0.499604	0.395732	0.245336	0.485316	0.446608	0.559469	0.334653	0.357501	0.355224	0.513195	0.390377	0.687323	0.472376	0.404074	0.448302	0.501488	0.349335	0.605688	0.388744	0.21747	0.627672	0.399137	0.423304	0.351872	0.654873	0.489101	0.485965	0.417938	0.768119	0.849225	0.317133	0.568314	0.522944	0.521876
ALOX12B	0.234047	0.431222	0.445628	0.0838086	0.412254	0.0619651	0.104717	0.117628	0.0872118	0.103177	0.0994022	0.0670281	0.221712	0.137202	0.0712437	0.138128	0.0502932	0.134245	0.0796678	0.0578793	0.148782	0.217669	0.3605	0.0624776	0.136396	0.312964	0.539966	0.303712	0.198994	0.289541	0.138302	0.158383	0.27461	0.148901	0.168296	0.00772774	0.0578127	0.0962145	0.206728	0.254095	0.124894	0.227927	0.315913	0.534036	0.388037	0.113584	0.451851	0.348917	0.514016
ALOX15	1.20905	0.0616852	0.184079	0.212525	0.151372	0.172674	0.579371	0.419565	0.0226826	0.211324	0.458306	0.108957	0.321271	0.558204	0.277942	0.444573	0.372796	0.314237	0.26246	0.365802	0.0558944	0.262035	0.183161	0.151121	0.644803	0.648854	0.213801	1.07395	0.391865	0.841541	0.0976339	0.34091	0.0221655	0.25311	0.214878	0.886356	0.699187	0.120115	0.555065	0.0660866	0.29235	0.569094	0.231554	0.075235	0.719918	0.077547	0.378871	1.08466	0.08324
ALOX15B	1.14681	0.851051	6.37482	0.0551343	0.574317	0.139764	0.793267	0.456925	0.0764975	0.345035	0.126822	0.240073	0.509336	1.1089	0.0703026	0.749666	0.297773	0.392508	1.47525	0.238612	0.203005	0.660063	0.205905	0.465817	0.492631	0.462754	0.46656	0.833209	0.216106	1.19366	0.317719	0.862295	0.282403	0.606396	0.28182	0.0542269	0.126775	0.303819	0.218663	0.731499	0.782505	0.626433	0.545806	0.442404	0.96815	0.809494	0.733523	0.66554	1.48021
ALOXE3	0.0114018	0.025384	0.0185167	0	0.00570998	0.0187591	0	0.01187	0.00684499	0.0136654	0.0127665	0	0.00745778	0.00692264	0.00629067	0.0182946	0	0	0.0187587	0.0408849	0.00389248	0	0	0.0308932	0	0.0252654	0.0113858	0.00912924	0.0133873	0	0.0232605	0	0.0200669	0	0	0.0109175	0.00816758	0	0	0.00920453	0.00630166	0	0.0135246	0	0.0243647	0.0100292	0.0142916	0.0117366	0.0274032
PHKG2	3.77097	3.71912	2.99715	3.01626	4.27732	2.96514	4.69051	3.39088	2.6906	2.65953	2.91823	2.44987	3.40946	3.07816	2.27741	3.7345	2.42822	2.94082	2.29191	2.43826	3.69742	2.42853	2.77561	2.906	4.05252	2.34047	3.12141	2.70393	1.72949	2.60386	2.69285	2.59631	4.24701	3.01711	2.98721	1.71929	3.0571	2.22115	2.98077	3.00277	3.18069	3.02055	2.60729	3.86706	4.79772	4.27621	3.16546	3.28323	3.20058
ACO1	10.6113	11.4583	8.98278	15.4192	9.36646	12.1369	9.54479	9.97779	14.5566	10.154	9.96896	6.08346	8.35484	10.9043	10.4787	11.2021	10.2903	6.23282	10.5277	12.7031	10.8388	14.1304	12.8593	9.71702	12.202	9.811	9.23073	12.3423	12.3858	10.464	8.7008	11.0228	10.0669	8.67092	10.6605	12.8202	14.9486	8.17881	14.0201	11.757	8.88809	9.8612	8.21176	13.1811	6.65106	10.8962	9.37218	11.0066	11.7867
ULK1	4.99823	5.78584	5.48161	2.69174	6.166	6.5948	2.10703	4.42324	3.11228	4.81762	3.21781	4.16129	3.91059	5.40221	5.89457	5.07528	5.88182	2.31204	4.74976	6.20931	2.92214	3.65618	4.42534	3.73191	4.17345	4.61379	5.38225	5.65783	6.83454	4.86198	5.12939	4.41197	4.36695	4.63015	3.6053	7.87758	6.13959	3.72167	4.40236	4.52401	4.13279	4.82994	6.42338	5.61636	6.14113	3.37546	6.13082	5.14305	5.64748
ATG3	8.20447	6.5191	7.96659	8.83012	7.22326	8.37575	14.3117	11.2108	9.22764	8.03815	12.9294	7.21992	11.0128	7.82876	6.40962	8.81372	8.21342	13.6608	11.3803	7.87629	10.2912	9.15231	7.65924	8.63781	7.92623	7.77269	9.46439	9.74001	7.46681	7.20132	7.62247	8.02075	8.12421	7.87461	9.76162	4.67528	8.18131	5.87394	8.33747	9.4692	6.86672	8.06043	8.05516	7.73042	8.2564	10.8823	7.92286	8.61267	8.9109
ATG4D	19.0736	17.8653	21.0427	21.0739	25.7012	8.88642	20.8224	19.6119	17.3878	15.2401	10.7046	26.6298	21.0863	12.946	9.95748	20.131	11.4052	13.3773	10.0628	13.5642	20.1546	14.6907	15.8842	13.8405	21.3005	13.1258	15.1659	13.3507	8.12051	19.504	24.8403	20.052	22.5007	19.2521	18.9622	5.49612	23.6055	21.546	20.2537	15.9676	25.9929	24.9715	15.8941	14.7966	23.2446	22.1823	21.2776	21.3352	15.2654
BECN1	13.1875	11.9342	13.6038	12.4994	14.9791	10.9602	10.5884	14.0769	13.2016	12.1152	11.2671	12.7469	13.6884	10.8029	11.6531	13.4701	11.7876	9.14641	13.042	13.0862	13.8645	13.2731	11.6127	12.6667	12.3626	11.6674	13.3057	14.249	11.7482	12.865	13.0412	12.1989	11.8263	11.8143	11.822	7.74402	11.4241	12.5475	13.941	11.9977	11.0677	13.2451	11.8251	12.8723	14.9936	13.0374	13.4244	13.4462	13.51
MAP1LC3A	14.0754	17.3337	15.2819	6.77977	16.7297	11.0084	14.9668	19.1114	10.4877	14.114	13.8531	9.93528	14.5776	15.3043	11.8667	14.9651	14.2335	14.8666	11.5419	12.4849	12.202	12.6931	11.9803	13.2696	11.5378	13.7078	13.5453	15.6434	10.67	15.0247	16.3205	11.2786	17.0858	16.0162	13.3992	13.5706	16.4531	11.2545	12.648	10.1942	9.81657	18.1979	13.5645	14.1433	13.4271	8.25039	17.2616	13.7164	19.619
GABARAPL2	22.5941	18.7238	24.3129	21.5149	20.4293	18.9703	44.8768	38.2249	23.7267	24.2515	37.5363	27.6223	36.0821	24.013	19.8017	25.9144	27.8473	60.7498	43.7283	22.4055	20.6222	23.7479	17.4453	19.6733	22.4125	28.0312	22.3224	31.7408	27.5737	23.5091	24.2315	23.781	18.6846	25.7535	24.1082	17.5415	24.642	27.2559	25.0965	19.4947	20.3674	26.0719	26.1972	19.3299	25.4165	25.2125	22.6943	24.7217	32.8058
GABARAPL1	9.51113	11.3804	12.4899	7.31816	10.5771	14.253	8.47762	9.98906	5.90834	11.8122	13.1636	10.8707	7.91276	10.7212	13.181	9.38267	16.0026	5.82913	15.461	20.0342	5.46601	9.26557	8.37608	14.4903	8.90255	17.7976	8.47093	14.0463	16.4954	10.6009	9.53364	9.72018	11.1349	10.6261	10.3131	17.3402	18.3577	11.3576	9.68312	10.4352	10.2814	8.63268	14.4679	10.0284	9.938	8.2231	8.38619	9.19818	12.3941
ATG16L1	5.98364	5.10128	5.38262	5.21181	7.28196	5.3578	6.09216	6.02637	5.95441	6.71271	5.4972	5.93471	7.38245	5.24715	6.73171	6.13897	5.04206	6.34451	6.97899	6.27163	6.56151	5.17091	5.82916	7.91695	5.58559	5.03895	5.5575	5.75032	5.7062	5.81185	5.71878	6.07144	6.22211	5.70627	6.28991	4.97933	6.00033	6.35025	5.45068	5.96658	5.84617	4.92215	5.75631	4.92255	7.66204	5.31008	6.97292	5.96472	6.34284
WIPI1	12.085	10.3692	15.6099	15.807	15.6888	13.0411	16.4029	14.8377	13.0653	8.53848	13.2705	11.3818	16.0153	9.83935	6.53549	18.4269	8.69715	15.1901	9.37116	12.3271	14.7519	12.1821	9.62816	7.48732	13.5989	9.61288	12.9992	12.4106	7.64955	12.1163	12.6587	13.3928	7.31893	13.0366	15.7192	4.00603	5.35305	9.02898	13.4338	11.9636	10.0781	13.951	8.12412	16.9494	14.9992	14.2992	13.8001	15.1812	13.0536
WIPI2	7.40463	7.00651	8.51188	5.87463	7.63643	7.75505	5.77396	8.75771	5.67955	7.53243	6.74822	6.26012	7.55305	6.99658	6.58445	7.24631	8.53747	6.09549	7.22585	7.28308	6.6323	7.14851	6.77664	6.03722	7.22591	7.24892	7.37033	8.18095	7.52771	7.65852	7.77656	7.03068	6.39899	7.76471	6.369	7.41932	6.5409	6.33289	7.1166	5.47067	5.9097	8.51718	7.90231	7.54687	7.43952	5.91043	8.33853	8.18327	8.8178
SNX4	18.3258	15.4035	18.5751	16.2694	18.5134	12.2547	20.8229	23.7655	25.1576	17.2348	20.9888	15.3832	23.4246	15.2485	11.7784	19.8567	17.3199	29.2719	26.0537	15.6281	19.4657	17.6033	16.7682	15.1423	14.9617	15.719	20.6546	22.3771	19.027	15.6771	17.5694	19.2767	17.8347	18.4467	26.4005	7.03861	22.4856	11.5085	19.3681	17.1001	16.3122	18.3095	20.5925	19.1619	19.4112	17.7831	15.5252	19.2548	24.8271
ATG13	12.0695	10.9881	13.3284	11.6422	11.7268	11.1596	8.11872	11.6407	8.86335	10.8498	9.92818	11.3688	11.6314	10.7782	8.77397	13.0972	11.3764	7.16062	9.37613	10.6276	10.2603	10.6006	9.22366	9.93604	12.4036	10.8112	11.4165	11.8359	10.1053	13.1292	11.6579	11.0041	10.4791	12.4418	10.1401	7.77195	11.7076	11.2205	11.6164	8.12949	9.41881	11.7483	11.1169	10.493	11.5054	11.0178	12.7158	12.2096	13.0727
ULK2	1.17816	1.54758	1.53668	0.627555	1.30654	2.8377	1.06861	1.91802	1.00669	1.79573	2.23601	0.661669	1.09111	1.98861	2.72022	0.913161	2.64973	1.35961	3.58049	2.95491	0.816317	1.01192	1.57904	1.50886	0.941762	2.22221	1.30045	2.28247	4.16016	1.15435	1.27417	1.20844	1.14982	1.026	1.0032	3.13618	0.804958	0.841174	0.999165	2.02352	0.816047	0.881543	2.17503	1.5431	1.50079	1.06697	0.980865	1.30765	1.99414
SAT1	129.111	94.2365	136.326	99.2606	100.532	90.77	167.223	125.38	83.62	70.5319	120.572	120.84	141.071	87.2778	42.6093	189.253	95.211	167.696	113.667	67.7188	78.9848	116.379	59.0107	77.2307	115.933	70.8586	75.6723	130.44	51.0515	120.31	99.4615	114.199	79.7204	84.6444	140.989	19.1774	191.483	158.258	113.942	67.0013	126.686	146.432	97.8165	74.5335	142.423	104.269	109.847	136.647	148.645
EGFR	8.92579	8.30209	10.9556	9.65622	8.26911	7.05105	3.33392	3.53132	7.94296	8.3291	3.33693	10.4287	4.95227	7.26791	10.7288	6.76677	6.76345	2.32916	3.95082	9.78631	9.92691	10.3318	8.71205	13.4061	8.88662	8.91269	9.00403	6.14959	8.98679	10.0333	8.4956	9.63616	9.18815	8.79218	9.88852	6.04138	4.82888	12.2755	10.8026	8.77175	10.4623	6.40358	10.0382	10.5849	9.05439	6.25105	11.3933	11.6433	6.84668
MAPK3	81.3776	60.3775	75.681	84.2089	72.8993	45.7347	63.8414	68.2059	77.4781	58.6362	46.3799	111.588	73.5232	56.4851	42.3612	78.7929	56.2585	44.2688	43.5806	45.6238	73.1467	75.3684	51.1617	50.7093	78.5773	57.7975	58.4749	51.9567	37.9476	87.6703	96.2126	83.3337	64.6002	82.7251	62.1442	23.3275	84.1744	104.939	89.3855	57.2006	80.1562	103.563	54.0748	59.8785	76.867	92.0292	75.3981	76.6125	59.4514
MAPK1	13.6959	11.6695	14.5237	15.9937	12.2689	12.3903	10.9203	12.7425	16.7192	13.9756	10.762	12.5505	11.2897	13.7401	13.7669	13.6471	14.703	8.50916	12.1225	14.5225	15.5588	15.9191	14.74	15.704	13.892	13.2218	14.464	12.5119	15.8921	13.9222	13.9244	14.8423	14.2148	13.8826	13.8189	12.7773	10.3175	13.3574	15.4339	14.2194	12.9612	11.7629	13.2514	14.0138	13.789	13.6306	13.717	16.0919	13.7771
BID	6.98605	5.89923	5.49263	6.8007	5.81889	6.34056	13.4725	10.0235	6.19984	6.13671	10.3649	4.84508	9.49845	6.11796	4.6976	8.0969	4.94236	14.7989	8.65131	5.15191	7.64046	5.49855	5.47414	7.2333	6.54728	4.74882	7.01952	5.61677	4.34752	5.18475	5.8267	6.78956	7.01453	6.15042	5.64842	2.22976	3.78523	3.74754	6.04409	6.88133	3.50138	6.3542	4.88393	6.64642	6.51643	9.35116	6.59519	5.67419	8.9919
ZEB1	1.59589	6.25405	2.964	1.59334	2.29339	18.8254	3.82626	6.22774	1.24967	10.0982	17.4972	1.56245	1.63709	7.74856	16.9754	1.64878	15.0102	5.09756	21.7468	13.329	0.884911	1.40546	7.53223	8.42172	1.69986	11.7402	2.1133	10.2125	30.5508	2.83827	4.43263	3.45454	2.34641	1.68186	3.42937	26.3145	3.0142	3.71649	1.82214	10.6128	2.4023	1.2714	9.07112	2.67601	1.65483	4.17643	1.13892	1.32474	4.61578
DPP4	6.60738	6.90153	6.45634	6.03631	9.88824	5.44483	5.61313	8.96813	21.9606	12.4053	3.35891	9.43031	8.45884	5.52905	7.8481	3.923	6.71361	8.08636	9.7911	6.42039	12.0849	9.5566	8.12181	10.5945	6.16874	8.12669	14.2516	6.71923	8.1599	9.59549	10.7696	6.41159	5.7692	9.2292	15.138	3.19613	156.331	7.87367	10.8843	9.39329	12.3745	6.53838	11.7816	3.19746	7.94214	5.42424	8.73974	8.78659	12.0233
CDKN2A	0.386225	0.260161	0.148767	0.158544	0.163662	0.293281	0.175221	0.520647	0.107015	0.352121	0.543338	0.274161	0.369219	0.186395	0.207625	0.386655	0.223711	0.46673	0.238964	0.337355	0.0676171	0.164073	0.169743	0.348824	0.334735	0.148125	0.365901	0.467829	0.383713	0.253143	0.303047	0.522729	0.238201	0.28712	0.112642	0.165944	0.900943	0.259737	0.290974	0.131912	0.191568	0.321636	0.246685	0.150173	0.306852	0.204709	0.281365	0.166501	0.785444
PEBP1	167.666	167.381	165.716	154.879	102.523	147.052	248.142	175.993	144.649	142.118	177.096	104.316	158.843	186.328	138.197	153.922	171.326	134.249	162.885	140.989	172.981	163.992	135.805	102.51	162.828	167.207	146.481	159.298	156.678	162.693	145.281	85.6489	209.964	165.065	175.761	132.524	450.998	93.0205	196.411	112.713	129.733	186.408	101.048	149.366	124.859	136.794	160.857	179.039	151.515
SOCS1	2.60725	6.32656	3.4101	7.81356	2.69903	7.3317	1.91955	1.8399	0.945447	3.38352	23.4721	2.16781	2.40354	2.52854	1.21643	5.80249	2.20814	1.72698	1.34348	3.70201	0.955802	1.69899	2.58117	2.79051	7.35841	2.46219	4.63051	3.20843	1.33545	1.85193	2.89866	3.74188	5.33806	4.54286	2.28887	1.59172	1.62952	3.24039	1.27874	1.48324	4.15858	3.78874	3.61156	3.10375	2.74834	7.63435	3.97723	1.76519	2.39716
CDO1	0.460241	0.872031	0.508893	0.203376	0.402125	2.69591	0.508228	0.774778	0.223392	0.69636	2.70821	0.948825	0.333062	1.48636	0.95087	0.167596	1.73915	0.542948	1.41774	1.39752	0.193895	0.452753	1.37326	0.454839	0.330988	0.943903	0.322692	1.4505	3.73669	0.509402	0.431504	0.351212	0.562985	0.561361	0.222763	1.50022	1.28368	0.202351	0.435265	1.03558	0.346375	0.17515	2.19532	1.17894	0.188328	0.430676	0.171839	0.329276	1.32973
MYB	14.0445	13.6189	15.0767	11.8464	16.2087	7.9056	13.8274	15.7952	12.0838	9.6347	10.989	4.9965	15.7384	10.6618	10.3172	12.9903	7.66625	11.3031	8.15796	8.87157	20.5135	14.0221	13.957	10.1896	11.7935	8.08511	13.1517	15.6382	7.88077	12.705	9.38442	11.1097	8.3835	8.51628	13.708	1.34889	1.58219	3.81791	10.0252	14.8504	7.09576	13.3536	9.4567	15.7514	16.9071	10.737	12.2447	14.2546	17.726
MAPK8	2.97189	2.61878	3.52489	2.89928	3.06134	2.60288	5.02588	3.45314	3.80885	2.81394	3.17306	2.86265	3.22085	2.90594	3.14668	3.0623	3.26005	3.72761	4.62941	3.79329	2.96849	3.31765	2.6802	4.34799	2.71988	3.01894	3.20111	3.49177	3.6802	2.68547	2.81934	3.14398	3.31457	2.60954	4.1695	2.22109	4.49217	2.30183	3.14629	2.91673	3.00454	2.8019	3.21887	2.91541	3.61298	2.8491	3.48049	3.6557	3.1326
MAPK9	5.6491	5.04984	5.57449	6.18321	6.09682	5.37177	5.88697	6.24987	6.78564	5.63451	6.13496	5.28315	5.16986	6.197	6.08029	5.9813	6.09719	5.57693	8.28065	7.25119	6.43449	6.24749	6.1443	6.0465	5.63026	5.85846	7.13507	6.7157	7.80477	5.98772	5.8443	6.70616	5.45419	5.26016	5.68583	5.9317	5.00689	5.33064	5.95649	6.32663	5.42679	5.20534	6.68945	5.44692	6.9335	5.64492	5.47866	5.92338	6.90934
CHAC1	1.16656	1.11305	0.752726	1.2078	1.2936	3.39304	1.35145	1.71325	0.775367	1.54795	2.86894	2.48701	1.30805	1.27743	1.05737	3.87724	2.04457	1.12037	1.85071	0.86649	1.29432	1.21196	1.21182	0.645055	1.86383	0.980906	1.79937	2.91887	0.97835	1.12102	1.66589	2.80529	1.68648	1.10497	0.671339	1.01727	0.865493	0.728475	1.27121	1.50511	1.81909	1.54922	0.753643	1.1104	0.801264	4.42515	2.01055	1.32947	1.25165
MAPK14	11.9989	9.6223	13.0898	12.0491	10.7066	12.496	11.9787	12.3354	12.9549	11.722	11.4268	10.7871	11.8215	12.3392	10.63	11.1972	13.7814	11.8436	13.3594	9.86454	10.7954	13.9247	11.1725	9.10012	10.1858	12.6087	11.2861	11.8315	14.1286	11.44	10.2096	12.6957	7.71013	11.8019	12.8127	11.6298	8.68478	11.0215	12.7403	11.8054	10.8075	11.8545	13.3284	11.8688	11.7919	11.5796	10.6794	12.5206	13.5441
LINC00472	0.0435807	0.110884	0.0657201	0.0215505	0.0311785	0.16389	0.0734369	0.0518516	0.0448513	0.0895416	0.118507	0.0301623	0.0162888	0.0982802	0.164877	0.0266386	0.164888	0.0552316	0.225344	0.200922	0.0170034	0.0287853	0.0970107	0.101213	0.0185679	0.151754	0.0683872	0.119637	0.197368	0.0279197	0.0304825	0.0589835	0.226449	0.0328188	0.0118024	0.26826	0.115954	0.0197925	0.0375232	0.206066	0.0412912	0.0234437	0.0221547	0.0743828	0.106432	0.0492869	0.0260124	0.0512689	0.067334
PRKAA2	0.343737	0.583642	0.854097	0.301426	0.589873	1.37237	0.529798	1.28111	1.11984	1.49594	1.94236	0.315616	0.647521	1.51934	2.48312	0.156881	1.70294	0.909746	3.21973	2.38463	0.91219	0.485614	1.51876	1.93544	0.216424	1.8179	0.716253	1.24401	4.01441	0.429563	1.00979	0.597039	1.13734	0.649292	0.343193	3.49103	0.850322	0.491749	0.27623	1.46147	0.341963	0.299861	1.8511	0.642345	0.815334	0.854663	0.428942	0.356975	1.71561
PRKAA1	14.7171	12.1286	13.7644	12.8912	13.1441	10.2994	16.5775	14.5971	17.4784	10.5118	15.9117	12.3762	15.6036	11.8347	12.1887	13.2062	14.227	18.0912	17.2812	12.4682	13.4293	15.0506	14.5349	11.742	9.95193	13.4543	14.954	17.5369	17.46	13.6744	10.4077	14.1631	14.6389	11.6494	19.2684	9.02556	11.4432	10.4508	12.9576	15.3877	13.5783	12.2957	16.0081	16.3531	15.0545	12.9396	12.7184	14.4342	16.5355
ELAVL1	9.86037	10.389	9.31525	10.2295	8.40482	9.12425	7.56418	8.34427	9.1718	11.7561	7.07494	7.32431	7.87283	10.3004	9.1591	9.78459	7.93851	5.07176	7.68272	11.122	11.7181	9.91123	11.359	12.593	9.70904	9.12251	9.89191	9.35544	9.06521	8.22318	8.80662	9.32613	13.307	10.1808	8.88314	7.07894	7.37425	6.03738	9.16402	11.9733	7.24951	8.33679	9.77736	10.1219	8.49897	11.9969	10.4714	8.85759	8.89876
BAP1	19.875	18.3184	18.5145	15.6176	20.722	15.4835	16.5161	19.2254	15.0706	16.287	12.5395	14.366	17.4183	16.7194	17.06	18.0304	14.9566	12.2119	13.5902	16.3489	20.1599	16.5081	17.7917	14.933	17.8994	14.602	18.3141	16.8065	14.1947	17.3657	17.5023	15.8975	16.6028	17.8322	13.7141	12.3799	12.0562	12.7731	16.3024	15.6716	11.7932	17.7281	15.1551	19.8325	20.4925	18.0195	19.1347	18.9934	19.4301
ABCC1	6.90745	7.38603	5.30329	5.17186	5.14135	10.224	2.90394	3.44972	4.614	6.68587	3.84018	3.18842	2.4469	7.54931	10.3042	6.80762	6.26454	1.72276	4.60285	9.17087	5.51424	3.66338	6.10547	7.02536	8.24823	5.96009	6.34103	5.28371	6.68823	4.69281	5.10555	6.52614	7.26791	4.88899	5.27326	7.9417	2.34734	4.23941	5.97142	5.7636	3.45952	3.85468	6.25669	6.77212	5.41504	6.09333	4.3273	5.05477	3.51615
ACVR1B	24.615	16.841	24.1233	20.0199	24.59	11.4912	11.4379	19.3546	22.5076	17.3862	9.29252	23.7708	24.424	14.8352	11.5147	19.2299	12.1782	12.3739	11.5736	10.3313	21.1382	23.3864	20.6275	11.6333	19.1526	14.8006	25.1144	20.0768	13.5262	24.7026	23.8431	21.1697	12.6725	20.5461	21.2177	4.3214	19.1304	20.755	21.0846	14.2146	20.3171	21.7466	18.6697	21.8881	25.1206	12.9632	22.3477	24.8517	28.1946
TGFBR1	5.64701	5.74838	6.56402	4.3203	5.01604	8.99024	5.39379	5.92779	4.31334	7.60519	7.96764	3.25801	4.12588	6.10414	7.62395	4.20793	8.17789	5.20626	10.7729	10.959	5.83162	5.57999	7.42456	8.58798	5.09393	8.69611	5.81418	7.15208	11.7787	4.66312	5.31862	5.65901	7.88985	4.87254	5.9493	8.83193	4.44901	3.58202	5.21942	6.28313	3.75978	3.89194	7.65683	6.82764	5.46134	5.24546	5.11141	5.65054	5.83379
EPAS1	47.1627	35.234	47.5094	37.5743	47.5552	39.6331	27.452	23.7459	53.9169	47.4367	17.9367	51.4084	27.903	40.4909	42.4826	34.1206	31.5882	12.2758	23.2887	42.4887	34.603	56.9012	40.3444	40.2693	42.3073	34.9151	46.2841	29.9588	30.8862	54.2012	46.4606	44.4131	58.7361	52.5515	50.714	21.7223	35.6875	54.0278	56.0219	37.5784	58.4341	37.9761	34.0687	48.2194	41.0444	38.6137	52.1175	48.8537	32.1017
HILPDA	3.01339	2.79415	2.12737	2.41056	2.12621	5.27018	8.5014	5.51962	2.74778	2.09334	6.87568	1.54806	4.94447	3.47055	2.66238	2.448	3.5008	9.77223	3.89576	1.90117	4.08669	3.11208	3.80801	2.50915	2.61483	2.54704	3.48481	2.60347	3.29495	2.57269	1.79989	2.24944	2.51505	2.1016	1.98271	2.43919	2.4034	1.25921	3.10499	3.56958	1.41936	2.71005	1.95303	3.41657	2.58901	3.16072	2.4229	3.02015	4.6416
HIF1A	20.7155	19.7447	21.4437	22.8782	18.3102	29.8422	23.1638	17.5371	27.9057	17.0808	23.8287	16.5867	15.074	18.4796	19.1758	23.1339	21.6926	12.8565	22.1598	23.5829	25.8334	20.0742	20.9012	26.8997	23.8044	19.5077	24.9831	26.6558	20.1452	16.96	15.1624	22.3767	28.7392	19.5701	27.4376	13.9502	13.5277	11.4601	17.1868	33.4366	17.9811	15.0824	23.1012	31.3456	22.4226	39.4999	23.17	19.359	21.0683
IFNG	0.0351978	0.0783611	0	0.258903	0	0.579097	0.0415178	0.366431	0.0422614	0.0421855	1.30055	0.048721	0.161157	0.0641112	0.0388389	0.903613	0.164506	0.175643	0.0772113	0.0252426	0	0.0813692	0.201099	0	1.34717	0.0389975	0.0527222	0.0563645	0.0619903	0.0789225	0.086167	0.142913	0	0.150753	0.0667254	0	0.0126068	0.293731	0.132587	0.0568293	0	0.0828372	0.0626261	0.0646962	0.0376072	0.0309606	0.0294124	0.0362313	0.0422972
ANO6	3.26152	5.43108	5.64761	2.41922	4.50248	11.503	3.26071	6.08633	5.83813	9.91034	8.72317	2.28974	3.67754	8.48357	12.6091	2.39176	12.8348	5.56516	14.2121	14.2359	3.76423	3.446	7.71983	9.02547	3.25793	11.2302	5.47672	8.90974	21.3753	3.92682	5.30173	4.77711	3.48167	3.12846	2.89163	19.0942	18.0886	3.35142	3.10627	8.21833	2.48883	1.65648	9.55296	4.7103	4.00208	5.28672	2.36219	2.81158	8.54567
LPIN1	2.29698	2.27404	1.57754	1.83291	1.58926	4.42634	1.05307	1.78548	3.39155	2.24109	2.73379	1.57099	1.33102	2.20549	4.11199	2.60783	2.75919	1.06416	2.28944	3.58364	1.7127	1.40934	2.97559	2.1909	2.41646	2.72515	2.8965	2.18643	4.21625	1.51392	1.36414	1.87849	2.93468	1.74932	1.92884	3.86929	1.40074	1.53401	1.30843	3.04919	1.66805	0.847248	3.21338	2.55115	2.07382	2.16035	1.89225	1.70898	1.99366
HMGB1	21.9822	24.9714	21.6698	29.555	20.9136	27.402	38.6484	30.8743	29.6462	28.4221	38.6448	17.2502	29.3701	22.3892	20.0359	26.0644	31.8251	44.909	46.6746	28.5221	27.7232	26.7478	22.7746	25.9965	22.5322	30.9915	33.5421	28.5235	31.8813	18.7675	20.0309	21.6994	21.9069	21.6264	24.956	20.3654	22.0414	15.8099	21.4519	31.6581	16.8188	19.2699	30.9802	24.5465	20.3554	28.396	21.9524	21.8029	25.3621
TNFAIP3	9.70134	13.2461	11.1443	14.7156	24.9507	7.16372	5.75167	7.50629	9.06482	11.0509	7.12763	11.3022	8.3774	13.2233	10.8548	14.9124	9.56684	4.45193	5.67407	38.2538	6.44134	8.99641	7.53407	37.3703	19.6307	13.25	11.582	13.2112	8.05717	9.71744	10.7805	12.0589	12.4084	14.0125	16.9912	5.50608	12.7802	15.2521	8.54932	12.8748	14.8611	10.9425	19.2244	10.6515	17.5977	14.4912	12.0715	12.3801	6.60932
TLR4	4.86947	1.78685	5.32173	3.9245	2.97779	6.44594	6.9224	4.69155	3.63337	3.06962	6.09161	2.24679	3.79325	5.46235	3.16812	4.53698	4.83512	6.70235	6.61131	4.20001	3.10758	4.8963	2.46142	5.17459	4.51657	3.90402	3.425	5.84835	5.60727	4.20284	3.14162	4.5289	3.67017	3.867	5.31914	1.59716	1.64769	5.66258	4.10793	3.5656	6.71247	3.60122	4.59567	2.67239	4.55354	4.03216	5.25505	4.02731	5.45467
ATF3	2.69004	20.1991	9.4482	6.66685	73.6766	4.67899	13.6185	5.49606	15.1684	37.0611	18.0187	20.7037	4.40747	16.4937	7.83942	9.38167	4.16607	7.36055	25.763	44.5733	9.73058	4.28894	10.5273	20.1675	21.4469	34.4367	7.75674	65.1896	1.96859	3.57386	24.874	4.57433	8.34199	4.80368	33.3937	0.939876	5.83035	35.4939	4.98463	47.5317	13.677	5.46435	81.6029	10.6253	6.83683	26.2523	20.3197	4.43482	4.60346
ATM	1.6828	1.42672	1.31964	0.754719	1.30258	2.15971	0.816866	1.21793	0.968733	1.44972	0.896936	0.726588	1.07054	1.49058	1.51242	1.69937	1.32729	0.880854	1.39167	2.21323	0.814516	1.05693	1.61139	1.21721	1.2652	1.80273	2.2348	1.67577	2.45286	0.847691	0.812793	1.04128	1.33433	1.3544	1.1271	1.36851	0.747214	0.645057	0.892226	1.24916	1.14028	0.748681	2.62841	1.60128	1.68613	0.893874	1.26173	1.34925	1.65632
YY1AP1	9.99121	9.56919	9.59908	8.0378	9.96846	10.8977	6.94674	10.165	7.99751	8.8462	8.4323	7.94137	8.46115	9.39984	10.3248	9.66501	8.82779	6.122	10.0465	9.52304	9.58741	8.41256	9.31472	8.23896	9.07616	8.98025	10.174	8.82344	11.1875	8.9304	8.42241	8.51896	9.56533	8.53506	8.63743	9.91153	7.25534	7.08571	8.47656	9.70243	7.50957	8.74389	9.48207	9.78106	9.36537	8.42272	9.95717	9.38009	10.8681
EGLN2	3.559	3.67728	3.19956	3.43804	3.78989	3.79642	2.15668	3.19958	3.05621	3.24474	2.64206	3.86848	3.37245	3.76368	3.07844	3.94645	2.94495	2.09621	2.68103	2.66691	2.67702	2.53407	4.15753	2.34138	3.52517	2.92851	2.90306	2.56518	2.42611	2.74776	2.96274	3.10537	2.66916	3.26641	2.99655	2.93346	2.08952	2.94258	3.22883	2.87312	3.70707	3.18166	3.30536	3.29481	4.07772	3.36276	3.1701	3.05291	2.83948
MIOX	0.0596756	0.0531424	0.00969138	0	0.0478163	0.013091	0.0281563	0	0.0143303	0	0.0133636	0	0.0312263	0.0434785	0.0131698	0.0766008	0.0371879	0.0132351	0.0130907	0.00855943	0.00814907	0.0183941	0.0247964	0.00923945	0.0118651	0	0.0476731	0.0477811	0	0	0.00973936	0.02423	0.0140036	0.0157287	0	0	0.0256487	0.0284572	0.00899168	0	0.0263856	0	0.0707856	0	0.0510085	0.0419933	0.0199467	0.0163807	0.0717122
TAZ	3.98651	4.90866	3.20758	2.49895	5.14341	4.05883	4.08641	3.6917	3.96334	2.81162	3.12152	2.41969	3.40344	3.73814	2.63033	4.52658	2.77287	2.79947	2.94819	3.07064	4.18828	2.70459	3.32522	2.95607	3.5885	2.60082	3.52748	2.87565	2.38833	2.50449	3.12342	2.82064	3.52671	2.90805	3.04704	2.26073	3.75664	2.36366	2.81181	3.69476	2.75036	3.58617	3.43073	4.55674	5.29758	3.73425	3.502	3.12519	3.8794
MTDH	20.5835	14.2232	19.6308	18.4422	15.8326	20.9987	20.7346	20.2765	21.2832	17.1782	21.5488	12.8299	16.4097	17.7695	18.1237	20.346	18.9886	17.228	23.7941	19.9093	22.1585	19.6013	19.1105	19.0191	17.2152	18.0007	22.055	21.825	23.7267	16.2715	16.6653	18.5799	21.8448	17.0372	21.6436	15.1327	17.9114	11.8809	15.7144	19.8118	13.673	14.8778	20.7833	22.1875	17.7675	20.274	17.1022	17.8839	19.5923
IDH1	43.8971	32.9818	53.7804	43.4606	42.5116	41.2756	64.8791	47.3162	80.0682	33.3404	44.2554	40.4089	43.6804	47.0575	25.4666	41.5892	34.1021	60.1734	35.5925	32.9141	59.0544	60.0503	42.36	33.1354	48.6049	33.8811	47.9973	49.1186	29.8648	44.2257	37.4588	53.8779	45.176	40.4045	57.119	11.6167	41.0693	27.4762	69.9804	46.9982	51.0222	52.3392	31.8191	59.4922	54.2031	37.9216	52.3479	59.4222	45.2324
SIRT1	5.21874	5.84281	6.64714	4.65473	6.09506	6.13744	4.65018	5.15353	5.74576	7.0677	5.83284	4.59312	4.41167	6.40004	6.06525	4.14146	7.72679	4.80002	8.99932	12.9204	4.68562	5.44428	4.90259	8.92235	4.56538	7.35289	6.33549	7.25212	10.4908	5.85933	4.87359	4.78105	8.9914	6.20094	5.60739	6.49435	5.05762	4.13275	4.76204	8.17126	6.89846	4.30985	8.60948	5.22476	6.05407	5.53511	5.67947	6.82325	6.31098
FBXW7	1.7941	1.54202	1.71739	1.59764	1.52355	1.5016	1.31251	1.23216	1.5762	1.69159	1.29723	1.28064	1.15305	1.71554	1.76816	2.44738	1.54199	0.868827	1.74154	2.23709	1.4455	1.49492	1.70354	1.80346	1.77944	1.40599	1.77492	1.76018	1.96706	1.2204	1.44193	1.67238	2.67959	1.58722	2.26347	1.15723	1.15681	1.09303	1.30769	1.64853	1.60541	1.24759	2.1553	2.00121	2.07054	1.6826	1.98154	1.69735	1.37972
PANX1	3.25132	4.28101	4.51958	4.45486	4.44278	5.52759	3.99947	3.9409	4.0711	5.16479	6.50951	3.10748	3.21021	5.1325	6.09901	3.54413	5.45121	2.85861	5.44256	8.41642	5.17985	3.85955	5.46024	6.77785	4.43281	4.18553	3.86515	4.51853	8.18939	3.20078	4.51669	4.11755	9.6551	3.58083	4.06504	5.72977	2.96121	3.81457	3.67422	5.33697	3.85064	2.84213	5.05952	4.95879	4.79727	4.48734	5.19446	2.95898	3.40476
DNAJB6	4.20096	4.77697	5.27481	4.07495	4.43837	6.42831	5.99324	6.29354	3.4291	5.84668	7.67247	3.53039	3.99814	6.18889	6.91067	4.26871	8.08062	5.44237	7.6413	7.84901	4.70109	4.60222	5.38063	6.67594	4.21758	6.95949	5.26093	5.91843	7.85063	4.29915	5.11645	4.84718	6.1126	4.13237	4.1284	8.89717	4.23312	4.20081	4.09521	6.55633	3.93032	4.58109	5.51599	4.48677	4.84779	5.40944	4.93209	4.72099	4.80241
BACH1	4.79152	3.10684	5.11548	6.1776	3.96451	5.19157	3.93829	3.60891	5.1461	4.90493	5.57341	6.30564	5.12715	4.13862	5.84809	5.53545	5.80307	3.39135	6.40402	8.27701	4.15156	5.4539	4.27338	7.75192	3.82179	5.39495	5.33397	4.69941	7.92841	4.46445	4.76001	5.50943	7.86095	4.48788	5.93449	5.09066	8.78085	6.5567	4.85079	4.24709	6.40792	4.38518	6.14815	4.62313	4.61499	5.37772	6.04887	5.83669	5.59441
LONP1	15.4158	18.9011	13.507	12.8589	16.4536	16.5851	11.3767	13.5035	13.438	15.2041	12.1776	9.66864	10.5106	16.1038	13.6243	15.5747	13.3447	6.89034	10.1765	16.186	20.7375	16.4692	14.9017	16.7605	16.2977	13.395	16.1139	14.3886	10.8987	14.8398	15.6791	14.055	18.8789	13.2716	10.5965	10.2766	13.5312	9.64557	15.0693	16.7532	9.42644	14.0996	11.2305	20.0797	12.8139	17.8279	18.0355	15.5575	13.2164
PTGS2	0.284776	1.2209	0.551671	0.320367	7.03291	2.71302	1.06051	1.58399	0.214924	4.05998	4.64626	0.771483	0.452364	4.41147	2.24902	0.474337	2.67462	0.987985	12.1771	8.49016	0.213883	1.68659	1.95667	1.84238	0.48128	2.66838	0.377811	6.31926	4.94381	0.496237	0.660635	0.443238	1.62292	0.187646	1.75839	2.59044	0.80724	0.491465	1.48036	2.38762	0.48117	0.758297	8.18425	2.25826	0.39555	2.09341	0.836287	0.505312	0.987534
DUSP1	37.6156	223.582	104.253	40.5721	234.953	80.444	82.2398	101.211	29.9311	256.791	106.347	209.116	65.0962	265.526	83.9625	70.2412	106.784	36.8857	312.535	158.631	47.0315	92.6854	86.4769	106.271	157.781	116.548	66.5904	223.085	66.342	63.1043	87.2775	58.9497	102.01	63.9689	109.026	39.3114	83.1712	53.0499	71.699	126.728	92.6294	134.268	319.08	156.283	76.354	152.951	76.4128	74.8973	32.5464
NOS2	7.4942	10.7146	8.82373	92.9836	13.5316	35.5485	1.16855	11.8632	5.27563	5.37279	83.8545	7.28278	7.01703	4.94902	3.26247	32.9772	4.39825	4.82692	2.77559	3.38671	9.5013	4.39055	11.2562	1.51397	40.4458	4.14592	10.6052	10.2912	3.24244	8.79329	10.124	32.6969	1.74054	5.23576	8.51443	0.948587	1.5811	13.789	3.78977	2.78464	2.16743	8.49012	6.08256	15.9355	7.08583	95.3541	4.4137	5.06886	9.34504
NCF2	5.42475	1.81891	4.94589	6.71537	2.47838	11.1374	5.13804	3.62782	1.42398	2.90135	10.4185	2.37126	3.1125	5.6272	1.99531	5.26243	7.1055	5.23628	6.14269	4.48371	1.30462	3.80793	1.58943	3.79713	5.63312	5.75081	3.1947	8.14773	4.46974	3.80177	2.38363	4.76588	1.88972	3.56004	2.91445	2.25016	2.09244	2.07136	3.17135	3.40417	2.47624	4.62439	3.44747	2.54996	5.27203	7.35396	4.8818	4.26024	5.70956
MT3	1.3069	1.82886	0.928558	0.848214	1.20379	0.486353	0.867127	1.57922	1.0788	1.62229	1.48945	0.751065	1.8165	0.651791	0.798302	0.723948	1.94515	3.72664	1.93257	1.37242	0.987931	1.24087	0.545467	1.30079	0.765622	1.88755	0.804006	0.607291	0.561726	0.920984	0.485621	0.694885	0.90361	0.884215	0.420293	0.849151	0.819159	0.556441	0.835145	0.904319	0.85129	0.988635	0.636692	0.461132	0.89766	0.975081	1.2481	1.41734	1.83692
UBC	132.484	131.814	153.843	179.143	230.828	151.503	140.024	171.609	136.556	189.231	143.003	161.151	124.531	136.703	174.351	161.587	153.335	106.558	194.908	197.519	159.011	128.41	108.623	177.349	175.639	161.342	132.72	138.563	166.704	141.883	165.958	166.228	148.696	149.512	131.957	135.297	192.43	195.167	132.635	108.182	142.026	145.97	197.865	96.0185	129.315	166.188	141.965	136.302	161.361
ALB	0.00634749	0.0113052	0.0103084	0.0219717	0.0254303	0.0139244	0	0	0	0.00507175	0.00710723	4.19982	0.0083036	0.0154155	0	0	0.00988887	0.00703888	0	0.0182087	0.00433394	0	0.0131875	0.00982768	0.0126205	0.0210981	0	0.0203293	0.0372639	0.0170792	0.0880551	0.00429545	0.0297903	0.00418252	0.0120331	0.0182335	0.0136408	0.0100897	0.00478207	0.0256211	0.0140327	0	0.0602338	0.0233343	0	0	0.06365	0.0130677	0
TXNRD1	16.3354	13.036	15.4	16.755	17.1839	16.1264	26.3209	15.7753	21.6318	15.3783	24.4877	18.9094	18.297	16.9608	26.0965	17.2106	17.1504	15.7122	23.6686	20.7009	22.6627	15.4886	21.6132	38.9643	15.5757	15.6666	17.943	18.9668	17.2927	22.619	13.9351	16.919	16.752	16.47	23.8677	11.0427	14.3112	15.0021	20.1261	19.5282	25.7253	16.9122	17.5459	17.0657	16.9586	22.9953	15.33	17.4971	15.8939
SRXN1	0.468752	0.24763	0.406434	0.336891	0.915121	0.549005	1.25578	0.669965	0.343417	0.317408	0.756151	0.412404	0.561241	0.463083	0.894216	0.509915	0.519858	0.599103	0.557707	0.558387	1.1663	0.306115	0.43742	1.08864	0.426512	0.149645	0.388753	0.559801	0.419779	0.46318	0.499213	0.3656	0.699143	0.382164	0.361474	0.433624	0.557744	0.309408	0.436947	0.487451	0.351286	0.53103	0.339267	0.416197	0.509328	0.866575	0.597515	0.45798	0.525109
GPX2	169.796	339.93	109.485	520.07	230.751	295.092	187.229	293.498	212.662	179.717	680.629	161.261	313.037	141.78	153.988	189.736	106.801	310.885	188.542	139.36	326.682	180.055	229.148	240.188	180.259	68.2856	247.195	273.119	91.0852	144.814	183.764	435.762	260.817	126.13	165.281	25.1803	52.3444	130.711	111.923	201.986	127.718	210.743	112.628	250.173	185.041	305.894	187.211	142.124	194.542
BNIP3	1.33115	2.28813	2.21566	1.19021	1.34212	3.86601	1.85185	2.67493	2.56469	2.45585	3.72371	0.948839	1.46946	3.22746	3.3037	1.23469	4.23721	2.47658	4.42374	2.82906	1.16252	1.35292	2.01677	1.74602	1.49481	4.33145	1.88129	2.98148	5.06788	1.79285	1.62757	1.20607	1.90951	1.66975	1.69351	6.07235	1.87859	1.23722	1.25274	2.0207	1.19278	1.0075	2.54419	2.02812	1.81446	2.07728	1.13083	1.45673	2.83259
OXSR1	10.5642	9.56795	12.4891	13.8443	12.189	9.47807	8.93588	8.47811	11.0956	11.4661	7.71986	11.4167	8.09619	9.71326	11.0341	11.5344	9.35601	5.48575	8.58388	13.5356	12.2121	11.7379	9.8782	14.9087	11.0565	10.2504	10.87	10.3769	10.9745	9.81372	9.97398	11.2058	15.3925	10.3369	13.3713	7.43287	8.67718	11.237	11.9835	11.0635	14.4077	8.7227	11.8948	10.0851	11.1932	10.8009	11.9857	11.7607	10.045
SELENOS	22.8926	18.5008	26.8157	26.8541	30.9444	19.0413	47.2789	33.3194	39.8974	28.9973	34.4211	32.4838	35.4052	19.3179	19.7024	31.7757	21.6188	50.2988	32.7191	23.1162	35.7032	24.8208	22.8052	34.7832	28.4282	22.0089	27.6119	29.4587	16.2864	23.1105	30.4366	25.3908	24.8166	25.4584	30.5901	7.59736	26.9835	32.2994	28.5846	30.4368	28.6583	24.2996	21.8951	18.7166	35.1326	36.959	29.7363	25.6779	28.3992
ANGPTL7	0.459742	1.71441	1.19771	0.132616	0.642743	3.48783	0.564887	3.46999	0.368002	3.4821	4.50423	0.80873	0.476125	1.44219	6.55264	0.481533	6.69983	2.38977	5.74639	4.31371	0.130793	0.405937	0.815866	4.649	1.64727	3.28969	0.946879	1.91722	17.0486	1.15972	1.46938	1.21205	0.899034	1.45788	0.526558	4.95238	1.87307	1.14946	1.06794	1.62375	0.42349	0.577062	1.61328	0.49294	0.429811	1.10367	0.288131	0.815025	0.437374
SLC7A11	0.264471	0.235517	0.22558	0.290409	0.327218	0.92144	0.398467	0.185096	1.01935	0.31076	0.35336	0.762927	0.389583	0.202404	0.201093	0.60146	0.21813	0.478117	0.475336	1.11889	0.628221	0.208936	0.588712	1.07874	0.408742	0.268397	0.723494	0.50181	0.315742	0.217272	0.224883	0.460213	0.607575	0.199162	0.353904	0.0234084	0.0923372	0.586426	0.20427	1.02984	0.626442	0.20085	0.308436	0.218548	0.389431	0.998953	0.627715	0.384333	0.454021
DDIT4	9.15538	28.0488	20.6873	9.72549	12.5604	23.7056	12.4702	9.92168	24.2239	8.96313	11.639	11.1519	9.82397	17.8966	7.63145	17.6704	22.3929	7.75018	10.4988	16.6874	9.45135	9.23817	9.4998	24.0767	28.4959	14.0443	23.9743	16.0121	8.26706	9.74355	15.4435	16.289	21.6675	20.9601	22.4504	16.4358	19.9511	8.63408	9.3222	13.3946	29.0018	6.5793	7.4623	19.2022	31.8391	25.0026	16.2933	10.9574	11.6904
ASNS	5.13874	4.52474	4.1258	4.95073	4.32764	8.01127	5.54496	5.86067	7.29075	4.50577	7.44546	4.25586	3.46818	5.52717	3.96073	6.69604	7.48101	6.36542	6.22734	5.59354	5.10525	5.53193	4.28849	4.89068	4.769	4.44603	5.54469	4.48048	5.27089	4.19035	4.65665	5.37249	4.96235	3.6809	4.62454	5.51937	1.99909	2.99427	5.02778	8.66974	3.3507	4.45255	4.93114	4.40431	4.22584	6.52624	4.96957	5.38868	6.27352
TSC22D3	8.11813	53.213	45.4134	4.54594	24.6364	14.6465	24.3984	14.2528	25.3808	14.1985	11.1394	5.46917	7.11916	27.318	13.6826	11.5223	33.2195	9.29665	21.8977	45.8473	7.63416	9.68688	13.0632	46.8261	32.4565	27.5914	18.0592	41.2617	14.6805	10.0686	30.3411	9.18858	25.4777	18.1874	61.6101	30.2361	18.3577	16.6646	6.59719	68.7097	37.6195	4.85214	19.019	19.9521	80.8806	16.0066	38.023	7.30556	22.8567
DDIT3	6.9589	6.31769	7.46549	5.81691	12.1593	9.87997	11.1243	11.1754	4.71645	8.52307	12.4556	11.402	9.70147	8.36797	9.37896	9.5991	11.1579	16.2975	16.8624	11.062	5.16759	5.87131	5.80424	4.77112	6.78345	8.91074	8.09881	11.1031	9.54239	6.71223	7.25375	8.89134	6.77434	6.64939	7.86395	7.18208	8.93891	6.74188	7.09232	6.53362	7.99166	5.97723	9.62017	6.30213	9.47952	13.2551	7.71101	7.91267	11.9842
JDP2	4.5415	4.72091	4.85741	3.37672	5.92952	4.39683	4.46075	4.4846	3.25275	5.68896	4.48842	4.25437	4.69977	5.28097	4.00222	3.97169	4.48298	4.09451	5.48272	7.3942	3.3614	3.0837	3.71774	4.48186	5.16425	4.36137	4.65525	6.81014	4.00429	3.90061	5.75395	4.54598	6.82915	5.18988	3.78007	3.57827	8.30921	5.11228	3.63386	6.38616	4.03581	4.99705	5.30137	4.41394	5.54296	3.60467	5.00449	4.10037	5.37903
SESN2	19.9332	12.6208	14.2855	21.0154	13.2374	11.4254	9.29216	14.3988	8.31818	13.6403	7.8405	22.7238	15.7707	11.7142	10.3708	18.6196	9.40042	6.95279	7.01308	4.78144	15.3139	17.8909	11.2722	5.47849	18.2797	8.43233	12.9931	12.9232	7.82812	21.0685	15.1718	21.4918	9.37407	12.4432	16.146	5.39127	20.5846	20.041	22.9679	7.14131	14.9178	18.6772	11.7006	17.5491	15.3481	12.0949	16.0188	15.6812	14.032
SLC1A4	7.4726	4.62983	5.31026	7.09211	4.89168	6.62072	3.9098	4.22257	5.12592	5.90657	4.71444	3.04237	3.55213	6.03183	4.29154	9.7777	5.34681	3.24748	2.819	5.80438	7.20713	7.24847	6.8191	5.4046	9.00423	3.8299	7.32324	5.16695	4.46126	5.08137	5.64661	6.8609	5.52738	6.65814	5.89713	2.99044	1.67514	3.4716	6.60485	7.21957	3.03221	4.3214	5.39743	6.74268	5.98397	7.34201	6.67802	6.34694	4.23934
PCK2	54.7477	43.0124	45.6563	44.4456	51.1035	23.2195	36.6741	37.317	47.3947	29.3115	16.8277	46.7981	39.16	35.4739	17.4983	49.4381	31.0669	25.8415	18.903	23.2481	41.2099	50.1177	32.1277	27.0599	49.7313	26.3517	37.1027	32.9698	17.9823	55.8683	51.7992	50.8826	38.9716	41.6077	50.9766	6.89879	222.192	42.4669	58.2585	29.6065	41.2344	50.4551	29.4444	40.2982	36.697	31.8001	54.2111	40.4461	36.4955
TXNIP	353.783	300.502	351.624	255.837	164.963	315.707	168.92	316.426	167.21	277.732	346.755	328.519	265.166	454.077	345.867	286.327	680.846	216.726	577.588	336.529	163.508	408.56	181.989	262.982	301.612	554.578	309.64	342.857	508.291	363.922	302.771	341.919	123.199	398.362	358.346	458.619	144.918	397.044	345.59	236.735	332.909	270.3	493.598	266.252	318.567	229.818	285.849	303.129	460.642
VLDLR	2.10935	0.74401	1.63825	0.502522	1.86902	1.11024	1.70024	1.28078	3.1169	2.47951	1.17191	1.45512	2.05678	2.07921	2.41113	0.387923	1.01196	0.890845	1.62882	1.55554	2.37268	2.5487	3.15207	2.08603	0.579579	1.06808	1.51732	1.58049	2.12092	3.14147	1.55459	1.01427	0.600552	2.18694	3.78988	1.43514	0.355144	3.0811	2.61629	1.1692	3.28812	1.44337	2.10728	1.0505	1.75836	0.906509	1.38096	1.16873	1.07019
GPT2	5.67429	5.43762	3.42143	7.06486	2.32468	7.5226	6.54193	3.13627	9.55524	2.50414	2.37971	3.78244	2.92593	5.91944	2.4792	5.6908	3.72103	1.86302	1.47637	2.77503	5.09279	5.18103	3.64111	3.20181	5.93951	2.70611	3.73597	1.9151	2.13497	3.29503	3.62281	5.269	4.23133	3.06984	4.66857	1.51498	1.08505	5.48574	4.5621	5.70553	2.55811	2.76296	2.90516	5.2893	3.59366	6.42743	3.68448	3.27118	2.27428
PSAT1	3.59544	4.6326	2.64904	7.69793	1.11861	13.2386	4.93437	3.52889	12.3392	3.02937	5.46278	2.13583	1.90957	3.5451	2.82148	6.76977	7.29555	4.03052	4.80318	2.52231	2.50172	4.72588	3.93848	2.77579	4.65543	2.63762	4.90128	2.96509	3.04823	2.53939	4.73272	6.212	4.27604	3.79576	3.30583	2.79543	1.95798	1.9855	4.29559	6.39033	3.45451	2.79446	3.04463	5.13208	3.20304	8.91045	4.08509	4.0943	3.76731
LURAP1L	8.51587	8.75648	11.4541	7.79572	6.93833	14.6009	15.0378	9.58777	8.51065	9.0055	14.9613	6.12349	11.1007	10.7193	10.1623	12.3035	11.9826	11.127	13.3654	15.0194	9.21941	11.3813	8.17786	14.765	11.1347	8.67769	7.47977	11.4876	10.7188	8.1429	11.6831	11.6821	37.478	13.3029	12.7892	12.5152	5.14956	10.6038	10.7711	11.1116	10.6913	11.3768	10.471	12.1046	8.35759	19.5979	14.3919	10.8116	8.75951
SLC7A5	4.14705	6.70219	3.59119	4.91008	3.51114	12.6897	5.63769	1.84827	7.42012	6.03878	3.37381	2.31678	1.73152	3.88928	3.65885	9.16201	4.59573	2.24428	3.28508	17.6082	1.97096	3.79095	4.48159	11.9463	8.45655	6.6018	5.53964	3.3277	3.01274	2.83622	5.12039	5.95208	11.9153	4.60195	4.4618	3.7546	2.72475	2.48455	2.98817	10.2332	4.44922	2.41129	4.9352	5.89962	3.7745	12.3382	6.61372	2.91408	2.46461
HERPUD1	46.3181	18.2889	46.4974	30.9748	37.3332	24.4874	50.7698	34.8565	25.0432	35.6335	37.4566	27.3832	37.3539	36.6579	19.9501	59.8783	35.5454	35.4687	32.9562	31.7475	28.0904	37.634	29.6536	25.2564	44.9924	26.3294	44.4423	46.1619	25.0167	30.7646	39.4764	39.3075	25.2627	43.954	48.4476	12.5498	23.177	34.1124	32.6866	27.0964	36.0998	41.517	32.361	26.1202	55.0067	47.3624	47.8469	39.9036	42.6135
SLC3A2	18.4631	13.3599	21.3958	14.7917	18.0613	16.764	12.442	13.011	14.3895	18.7315	10.8742	22.1588	14.6813	14.4874	16.5817	15.7511	16.7296	9.23176	12.3048	19.3629	16.5634	14.253	16.3413	22.0036	15.9597	15.2688	16.4322	13.4407	10.1197	17.28	23.3664	17.7329	21.9982	20.7528	13.8749	9.91361	36.7507	17.5924	13.6322	15.6135	20.0564	15.2688	17.4173	14.8263	17.8118	20.4535	19.4031	16.8973	16.0235
CBS	0.028429	0.0815759	0.00512989	0.0109341	0.0063276	0.0485056	0.00745191	0.00328848	0.0379269	0.0176674	0.0176843	0.010931	0.00413222	0.0191785	0.0139422	0.0202734	0.0147633	0.0140114	0.017323	0.024919	0.00647026	0.00973648	0.0295321	0.0195627	0.0314026	0.0174989	0.0189259	0.0177042	0.0222529	0.00566623	0.0283541	0.00427519	0.0185312	0.0124884	0.0179645	0.00907377	0.018102	0.0125526	0.00951905	0.0204003	0.0104749	0.00297364	0	0.0174182	0.0405001	0.00555703	0.00527915	0.0130061	0.0151836
ATF4	78.1192	97.9343	77.2664	67.0856	88.8244	120.026	142.785	132.225	63.8822	84.928	143.663	76.373	94.4747	96.5169	105.412	107.304	132.768	154.242	151.165	118.714	72.2355	65.395	93.7985	69.1485	80.823	102.886	77.3533	95.1405	142.999	62.678	90.2078	77.8312	97.7107	64.7957	81.2392	138.212	90.359	67.8473	66.0352	130.534	92.0437	75.4109	103.131	54.461	94.1985	123.915	89.853	77.8969	123.252
ZNF419	0.342625	0.371859	0.397758	0.208475	0.327083	0.446269	0.385201	0.504387	0.37603	0.357175	0.48254	0.279741	0.798377	0.484308	0.502122	0.435219	0.521271	0.501646	0.619479	0.328264	0.199212	0.402223	0.475485	0.362632	0.391176	0.480446	0.459752	0.362206	0.622287	0.355317	0.251195	0.320618	0.270098	0.495623	0.436398	0.458785	0.320216	0.270182	0.360974	0.369515	0.346182	0.466176	0.460389	0.255844	0.592018	0.327278	0.422752	0.466573	0.588649
KLHL24	6.55454	5.22789	7.19772	3.84503	5.34877	5.31927	3.30012	5.46669	5.12363	5.36194	3.97891	4.68563	5.5499	5.71136	4.59386	4.85621	6.38939	4.59467	7.59414	4.44832	4.12338	6.15651	5.51402	2.56105	4.12893	5.87284	6.52549	6.86122	9.44166	6.5678	4.45487	5.49373	2.56738	5.84569	6.89163	6.51101	7.76273	4.70519	5.59896	2.92876	4.89224	5.87178	7.81892	6.04209	6.2248	2.53507	4.52878	7.75968	7.45671
TRIB3	1.49187	1.20625	1.34319	1.11276	1.30668	4.46401	1.17807	1.91704	6.3481	1.89029	1.93603	3.51664	3.005	1.03844	1.28803	2.47053	1.54623	1.99355	1.76639	2.00105	1.53858	1.31797	1.12179	1.20324	1.55759	1.45236	1.74533	1.16952	0.806199	1.50602	1.88468	3.48492	2.1386	2.04421	0.816501	0.794935	0.836166	1.20058	1.26032	1.89473	1.34548	1.02247	1.52527	2.59875	1.45393	2.23471	1.54397	1.08804	2.16034
ZFP69B	0.592934	0.336014	0.459581	0.233231	0.350927	0.404009	0.519251	0.561164	0.355963	0.200991	0.523075	0.19275	0.282058	0.381819	0.485747	0.442055	0.25193	0.408458	0.522244	0.508988	0.496854	0.408449	0.466622	0.43815	0.500146	0.388193	0.565183	0.56107	0.443025	0.346479	0.34456	0.437725	0.621911	0.408458	0.357649	0.412906	0.180193	0.0785415	0.372254	0.551192	0.357499	0.321378	0.404943	0.561442	0.595127	0.387215	0.525504	0.443886	0.507407
ATP6V1G2	0.449276	1.26251	0.510741	0.276473	0.339993	1.43455	0.600606	0.987418	0.371613	0.949302	3.05184	0.428414	0.365698	1.58818	1.13472	0.224272	2.14647	0.697498	1.78494	1.3461	0.204505	0.223111	0.404481	0.757437	0.555821	1.44908	0.717827	1.35897	1.81698	0.376093	0.570299	0.439158	0.363142	0.401298	0.719217	1.87372	0.843919	0.698277	0.255737	0.677028	0.562835	0.169178	1.16058	0.807452	0.213347	0.447883	0.225258	0.308312	0.635877
VEGFA	4.56456	4.77649	5.68813	2.95771	8.79997	2.68171	3.07316	1.79069	3.95216	4.54204	1.78624	4.38251	2.75147	5.34255	2.80275	3.21272	2.49459	1.81188	3.36591	5.08128	2.27076	4.97793	3.27118	2.69994	3.48641	3.81808	2.95914	7.75551	1.93762	4.82004	3.4339	4.37152	4.6777	4.43179	7.76334	1.58584	7.62166	3.8946	5.11519	5.14903	6.11279	5.33179	6.4257	5.86317	6.6704	4.06733	3.5735	4.34539	3.41109
GDF15	5.80308	6.96049	9.15739	1.76875	54.6563	7.67189	3.27109	21.5458	6.74568	31.5054	3.42709	7.94736	23.8088	22.1254	7.99008	4.7023	2.78423	12.2553	18.4752	17.2658	13.9625	6.04682	13.0914	12.4754	4.14556	4.0398	16.1026	36.1763	3.46106	6.05231	20.4673	7.97224	6.54371	11.6271	6.60063	0.472062	3.36236	2.9632	5.37012	16.0359	4.46183	28.0207	23.6109	9.92079	13.2347	9.3236	8.49691	13.7584	10.3554
TUBE1	1.01752	1.28664	1.24059	0.760819	1.31163	1.39928	1.90004	1.43053	0.992872	1.06109	1.61086	0.65742	1.07774	1.34009	1.21097	0.927295	1.35054	1.92262	2.57598	1.36024	0.745114	0.987807	1.18792	0.870991	0.95043	1.27722	1.33226	1.71064	2.10787	0.81887	0.70991	0.894516	1.16862	0.873025	1.57345	1.16856	1.00855	0.601025	0.937957	1.79671	0.975225	1.02154	1.64451	1.26286	1.67509	1.2817	1.11999	1.15603	1.70668
ARRDC3	10.8872	6.37969	12.5551	4.74831	6.05272	11.8176	11.9247	15.8435	6.80204	10.7645	18.2757	6.01059	10.73	13.5316	16.6922	7.05907	16.6229	18.2155	23.0629	14.4692	10.0261	13.1032	6.9726	15.0772	8.82798	15.0997	11.1321	15.0689	18.2308	10.318	6.54794	7.68503	8.97139	6.5469	11.9502	15.9615	3.68471	6.36361	9.0368	9.18184	4.79263	9.21026	17.5262	13.2398	11.0661	11.1013	7.60196	12.4083	17.5573
CEBPG	22.8642	19.2316	24.2244	29.74	22.3018	17.7015	27.3422	21.835	31.9804	23.5535	17.722	34.0501	27.342	22.0047	19.9476	26.1521	18.715	20.9842	23.3989	21.1406	29.9649	28.4673	21.9946	27.737	24.5853	19.7598	21.3907	18.3575	16.3641	22.83	25.9226	28.1531	31.9698	27.429	32.3999	7.8498	32.6456	28.4879	27.8096	24.4366	33.2719	27.3203	23.4087	24.1438	26.4543	28.5838	29.5301	26.4785	21.5836
RGS4	0.141839	0.528928	0.194357	0.103565	0.253053	1.81829	0.402583	0.927511	0.101118	1.63623	1.56831	0.131912	0.173953	1.41018	1.09559	0.0711203	2.17521	0.688139	1.52169	2.09802	0.124083	0.116131	0.492677	0.689703	0.141008	1.50276	0.349672	1.94131	3.10697	0.262383	0.387021	0.326949	0.234031	0.128509	0.546179	3.91738	0.996998	0.57422	0.293862	0.797954	0.240078	0.125181	0.820199	0.187386	0.194172	0.744686	0.192604	0.146004	0.926813
BLOC1S5-TXNDC5	0.110358	0.0462478	0.115968	0.0955008	0.013004	0.0925644	0.191432	0.0473075	0.171477	0.124487	0.0145373	0.0179716	0.0339688	0.173422	0.0644688	0.124993	0.131475	0.0935838	0.106803	0.0512114	0.035459	0.0950457	0.148358	0.0753818	0.122619	0.151041	0.116685	0.0363843	0.137197	0.192139	0.143029	0.0395371	0.114251	0.0812729	0.467643	0.0310795	0.0279013	0.0567535	0.0880324	0.068128	0.143514	0.0305559	0.154005	0.155118	0.0971046	0.131334	0.135616	0.0712775	0.0702093
EIF2S1	8.61439	9.06302	9.6654	10.9046	8.13419	12.2029	18.3268	11.6021	10.7849	10.808	16.6577	6.83365	8.99146	11.1099	11.5272	9.64072	11.4349	11.7821	17.241	12.802	13.649	9.94993	10.5563	15.5663	8.89951	11.2002	9.87117	10.4782	13.5794	7.66504	7.81579	9.89038	14.1663	8.15319	10.3405	9.35623	7.2251	6.43349	9.84204	15.4886	8.01688	7.8524	10.4026	10.3084	10.0228	14.8244	9.05593	9.0977	9.18955
IL6	0.124324	0.858026	0.151427	0.089655	3.24793	1.63636	4.876	0.269643	0.0497577	0.918865	1.29924	0.372861	0.108424	1.22031	0.697355	0.0997403	0.451934	0.172332	0.954524	9.50301	0.0424429	0.0798354	1.89416	0.521321	0.133894	7.78257	0.175876	1.7669	0.693369	0.0371688	0.456531	0.14022	0.522702	0.300373	3.86914	0.406728	5.25441	0.403471	0.0468315	9.81899	0.217588	0.204815	2.29806	1.32349	0.166043	1.59479	1.32458	0.0497676	0.0995998
CXCL2	1.329	2.49426	0.951513	1.23664	13.8121	4.93738	1.83733	3.7044	0.720641	3.53965	11.5045	2.07698	4.4866	2.06498	2.09722	3.05722	2.27084	1.85408	4.13791	11.0274	0.6147	1.51965	3.42915	2.24573	2.41511	4.82906	1.22723	9.4282	2.29868	0.974094	1.78417	3.66511	2.63242	2.81546	4.36157	1.17676	8.68072	0.851819	1.30269	3.03406	0.805604	3.20176	5.3395	3.7036	1.77115	20.7279	1.99422	0.970853	1.08188
RELA	18.3677	15.3087	18.4283	17.2358	19.1277	18.6103	14.6181	18.2438	14.3194	17.5317	16.4459	17.0783	15.7296	17.8879	18.8998	18.8377	19.3926	10.3973	15.0428	20.4032	17.8955	15.472	16.7208	21.107	17.6867	17.0819	18.71	17.4331	16.1354	18.2966	18.5355	18.3259	24.8191	19.5709	13.513	17.3845	15.0487	14.3986	14.7747	16.8801	13.9893	17.8082	16.1752	18.5787	16.4981	19.345	20.4921	16.5486	17.9474
HSD17B11	107.345	78.3541	142.941	95.2011	99.9237	46.2889	133.244	134.92	127.269	67.7285	60.5695	110.782	79.4483	96.0993	51.2204	109.288	79.2833	144.896	90.6833	52.5451	98.9158	105.857	73.7697	73.2387	96.4761	101.962	89.3041	85.3004	65.3543	129.541	84.7369	99.8303	82.6093	112.316	126.797	25.2367	233.201	113.077	120.704	65.2952	117.333	141.743	123.852	94.3334	97.5274	64.6645	101.647	112.2	141.458
AGPAT3	14.272	11.023	14.1175	12.7364	12.7513	9.81166	7.60142	9.36008	12.9119	10.5742	6.70144	13.2753	10.858	12.1689	10.2749	13.5493	9.09367	4.76205	6.3814	9.88694	12.8088	13.3375	12.8643	9.23573	13.4092	10.1044	12.4857	9.52807	8.22373	14.5723	14.765	14.4454	11.5889	14.7633	12.8246	6.51759	19.8436	14.4996	13.8202	8.43473	15.3417	14.7806	11.7047	12.8008	12.5321	9.00853	14.4696	13.7254	11.4383
SETD1B	8.22973	6.82365	6.16967	6.11776	7.29251	8.88533	2.02542	4.53077	4.18531	5.38499	3.66628	5.23902	4.03046	5.21898	8.28449	6.9306	5.27792	1.87555	4.04101	5.79482	6.11905	6.46492	8.81152	4.86804	6.30528	5.0047	6.11467	5.4024	7.05335	5.77182	5.4912	6.40317	5.96848	5.5451	5.3324	9.24779	4.97737	4.83182	5.52028	7.55746	4.79357	4.76931	6.69142	7.20327	5.88961	4.91445	6.50862	6.35353	5.85263
FTL	2293.4	1857.09	2396.46	1887.31	1936	3907.95	4805.9	2725.13	1083.48	1476.4	3071.9	2122.19	2534.73	2577.71	1224.75	2619.31	2379.35	4483.24	2773.93	1489.12	1255.81	2159.24	1451.04	1503.2	2362.14	1713.34	1915.4	2780.81	1339.18	2856.66	2276.6	2460.27	1955.21	2907.51	1790.75	1057.68	6525.33	2186.9	2243.34	1172.1	2275.7	3159.46	1575.09	3101.87	2184.82	2698.86	2331.54	2417.9	3064.44
MAFG	6.73041	6.87122	7.50913	5.5791	11.1419	8.87306	4.38843	4.3477	6.28638	7.7926	4.76344	6.77263	5.60825	8.46695	7.82993	6.87436	6.30149	2.85517	6.10291	10.3015	4.72437	5.44902	7.93855	7.30837	6.45826	7.74815	6.98335	7.62799	6.13291	6.09545	6.89958	7.78918	6.53334	6.9783	7.13072	5.5598	6.66268	5.56783	5.05818	7.10082	9.43684	6.56015	7.67169	6.04209	7.96772	8.37638	6.94182	6.55464	5.03337
IL33	3.14317	5.58638	3.15689	1.67078	3.47816	14.9756	8.0913	5.08327	5.6174	7.54486	39.901	3.89473	5.68928	7.30544	8.97254	2.5798	19.115	16.8211	28.2448	12.4475	2.91095	3.93526	8.11147	7.48849	3.12474	12.499	5.04697	15.6329	22.5994	4.6276	3.93608	3.68328	5.53574	5.3406	3.68507	17.8686	3.52604	2.45621	3.89702	8.38894	2.93538	1.60044	8.72291	12.4753	3.35129	7.47708	2.10893	2.40568	11.0384
FTH1	421.751	251.013	407.148	254.769	399.016	193.395	258.834	396.943	294.519	400.568	222.938	510.489	449.447	376.704	248.099	372.627	215.601	260.665	302.827	274.172	430.225	391.679	388.118	364.129	405.327	282.057	365.829	329.825	187.731	509.458	576.784	324.557	294.1	402.628	217.391	108.013	566.813	690.972	423.312	224.26	658.432	689.53	303.048	301.953	404.906	292.93	480.302	489.695	458.307
SLC40A1	97.1378	27.9498	103.554	81.4984	45.7207	60.2607	129.079	131.214	110.456	54.7323	139.312	154.166	101.13	52.1244	34.6491	95.0317	66.5118	285.447	126.231	30.4792	35.5989	113.463	55.2257	39.6801	60.2088	50.8447	76.2085	118.69	49.6502	111.721	75.3727	112.076	22.3508	62.5811	59.6961	10.6511	94.5878	107.88	103.227	19.2308	56.8334	83.3962	84.4877	48.3446	90.9765	79.6046	80.4393	80.4186	145.833
GPX4	64.2321	60.339	56.45	24.1265	46.0654	63.9313	100.586	71.7328	37.0442	52.5611	67.7238	51.4578	71.3739	63.3259	53.1634	52.6951	59.5944	77.0209	73.6999	50.2755	40.4856	49.0957	40.6412	47.7192	48.7835	54.8037	52.1719	57.771	46.6463	52.5441	52.2764	43.3088	56.4298	63.794	45.6473	39.7993	175.111	52.1301	56.2298	41.0543	62.1284	75.7392	48.9885	55.5288	46.611	43.2759	69.7945	60.8359	71.5868
HAMP	0.00712141	0.0380507	0	0.00616267	0.0142655	0.492098	0.0336004	0.155691	0	0.125183	0.247188	0.0345013	0.00931603	0	0.0392905	0.068559	0.0110946	0.0789711	0.0546764	0	0.0145871	0	0.0295909	0.0937205	0.021239	0.0157804	0.149339	0.14255	0.0334459	0.00638722	0.023245	0.0385534	0.0250669	0.0375398	0.0405007	0.0272756	0.0204054	0.00565992	0.0107303	0.011498	0	0.0201121	0.0675779	0.104718	0.0152178	0.0626412	0.0833124	0.014661	0.0684625
HSPB1	152.856	240	112.647	111.173	149.787	175.961	316.859	249.282	89.8281	226.764	189.409	137.442	140.378	302.505	317.91	123.079	367.587	153.358	208.921	215.388	106.275	170.012	275.096	181.702	176.582	222.742	118.515	164.876	265.728	184.49	228.733	170.482	168.573	183.383	154.411	721.209	131.26	216.864	194.649	194.872	165.932	185.008	155.358	138.997	125.517	110.222	174.298	118.868	162.799
NFE2L2	19.8867	20.3594	22.5089	21.7824	24.5289	17.9235	25.2294	18.9379	20.7438	21.1979	18.3009	21.5995	18.469	21.9326	17.7031	21.8861	21.012	16.8885	22.9761	25.1841	22.1482	24.7645	18.5765	20.6794	20.458	25.1794	20.5997	23.2485	21.7963	17.9843	18.5978	22.968	31.9439	18.7687	26.6012	12.4646	19.3331	17.1218	23.8333	24.7976	24.6929	17.7728	20.9652	20.672	23.9217	23.8439	24.2005	22.2777	22.7906
STEAP3	15.5527	13.2475	9.27135	14.7234	13.662	10.3642	10.8908	7.52333	13.2635	5.34243	6.71842	7.27144	6.68146	8.17618	4.36557	12.3894	8.60122	2.21446	4.21051	9.58016	15.133	10.3518	13.6278	7.54771	13.9247	2.93094	9.74542	3.34832	2.51019	10.9571	6.20383	14.3499	16.2469	6.14264	10.6444	1.75915	1.58868	3.53648	14.5455	11.5692	8.77238	16.0256	5.07186	19.0695	13.8511	9.47709	12.3014	9.26381	5.55609
DRD5	0.156396	0.385052	0.0597621	0.413983	0.0184288	0.0100907	10.5803	0	0	0	0.0412036	0.00636719	0	0.368653	0.0304544	0.541247	0.874282	0	0	0.0131955	0	0.857799	0.0191135	0.0427314	1.16152	0.0203858	0.00918678	0.0220983	0.0108017	0.18978	0.0225218	0.659917	2.64458	0.236417	2.26723	0.158561	0.0395409	0.153547	3.31991	0.0148537	0.630491	0.424368	0.0109125	0.684849	0.0294886	0.129476	0.0922515	0.763904	0
DRD4	0.464411	0.361872	0.636363	0.163267	0.363398	0.350203	0.102712	0.181305	0.331081	0.197132	0.146249	0.281243	0.284779	0.581558	0.304269	0.419152	0.226098	0.0965618	0.222852	0.353875	0.267545	0.525622	0.195987	0.258404	0.375122	0.35375	0.289847	0.139442	0.13632	0.416531	0.544771	0.353558	0.527871	0.344264	0.0825371	0.430786	1.08119	0.219154	0.349878	0.152308	0.160421	0.327894	0.430369	0.400135	0.372151	0.0765944	0.351695	0.418291	0.331362
MAP3K5	6.33807	4.61111	5.45837	5.21544	6.38863	5.66613	3.1659	4.58685	8.08563	5.88459	4.20913	5.08879	4.66913	4.03469	5.17393	5.67284	3.9988	3.41112	4.27833	5.04694	7.69183	5.86522	6.1473	8.55518	5.43695	4.15156	8.2868	7.32412	5.13518	4.69128	4.93784	5.613	6.37418	4.95671	5.14173	1.85393	3.80763	3.88402	4.66535	6.39905	4.0883	3.69107	5.8591	6.30043	6.72875	6.5564	5.84012	5.2149	8.47138
SLC2A1	12.4688	11.7624	17.2397	15.6996	28.4198	14.0534	12.4908	10.3086	16.9823	19.0844	7.39957	26.1572	14.3479	16.0972	12.8514	21.6913	12.3493	6.63368	8.99491	31.5629	24.3345	16.7359	15.9445	51.0956	14.3983	10.3491	16.6784	14.533	5.76204	17.4813	21.6882	15.757	28.2337	16.9194	15.3817	5.22391	2.95757	14.9479	17.4962	15.868	21.3715	16.3252	18.2891	11.6313	17.9197	24.2279	25.0523	13.5336	10.4249
SLC2A3	1.82718	4.05082	3.19345	1.79202	6.02709	2.90886	1.58053	1.34785	1.0447	6.39598	2.41609	1.68131	1.36587	4.86435	2.00468	2.84428	2.18511	1.33151	2.82481	8.95807	0.660615	1.86125	2.4187	3.33821	2.78872	7.71212	2.48494	6.54306	1.70402	1.47961	2.59297	1.70752	6.83175	2.95605	2.81066	2.11947	2.40834	1.74817	1.65712	9.47407	1.64656	1.3728	8.46301	4.63153	1.67708	4.63798	3.16713	1.42346	1.47636
SLC2A6	1.65913	1.72015	0.678528	1.04276	2.35922	1.83309	0.585682	1.43098	0.814283	1.54823	2.18993	1.65538	1.08521	1.37498	1.11583	2.34474	1.27353	0.839346	0.796978	1.32014	0.545739	0.96588	2.47203	1.31252	1.83601	1.56317	2.61821	1.47873	0.902922	0.814641	1.24024	1.34403	1.76906	2.17451	0.872406	1.19439	0.468459	1.04913	0.652349	0.987433	1.28511	0.70114	2.50671	0.92935	1.81799	2.3116	1.44714	0.835223	1.28795
SLC2A8	5.76269	6.54597	4.31155	3.90071	6.47694	9.80438	7.48617	8.17521	4.78313	6.45327	5.85974	4.76641	6.51773	5.54643	7.9666	4.83334	5.87468	4.94407	9.27146	7.34979	4.79163	5.12611	5.09628	7.94639	6.05441	5.0123	6.38124	6.12152	9.00232	4.93853	6.0429	6.03789	6.51813	4.14598	4.48979	9.70333	7.14588	4.39788	4.96641	6.9033	6.16485	5.32733	5.56683	6.41955	5.38752	6.87861	6.09689	4.56127	5.7643
SLC2A12	0.124736	0.243523	0.319443	0.0871849	0.374804	0.75249	0.435742	0.664275	0.794926	0.866332	1.39129	0.0730488	0.332629	0.262155	0.799371	0.123165	0.911852	0.617134	1.48916	1.14229	0.409459	0.170059	0.408664	0.341686	0.143083	0.616593	0.598847	1.4136	1.26742	0.206541	0.375833	0.224014	0.112581	0.183351	0.26375	1.07494	3.5054	0.228778	0.209634	0.383426	0.201518	0.234851	0.677197	0.176365	0.220416	0.18568	0.128288	0.269967	0.962792
SLC2A14	0.0153797	0.0308159	0.0593199	0.0432547	0.11168	0.0843456	0.00907061	0.0440309	0.0877141	0.0245773	0.0172205	0.0532217	0.0402385	0	0.012728	0.0658057	0.0479206	0.0426373	0.0379547	0.0193021	0.010501	0.0859229	0.0439352	0.00297651	0.0229343	0.0851999	0.061432	0.0184714	0.049659	0.0620735	0.0533385	0.0286212	0.0270678	0.0532039	0.0218668	0.0257711	0.0468225	0.12529	0.0405537	0.0062079	0.114752	0.0289566	0.159626	0.0459372	0.147893	0.0135282	0.0160647	0.0554095	0.0600658
EIF2AK4	4.15909	3.41002	4.38018	2.24327	3.3972	3.89726	2.82511	3.74945	3.2158	3.30743	3.64724	2.22465	3.63033	3.41555	3.07011	3.48243	3.54977	3.29806	3.78706	4.89968	4.50443	3.5365	4.28881	3.93167	3.35411	2.69135	4.80843	4.29756	3.82878	3.18845	2.95652	2.86912	4.28885	3.3855	3.02466	2.93874	1.90317	1.81947	3.22117	4.50233	2.01134	2.34582	4.3061	4.39901	4.22736	3.03238	4.11664	3.71161	5.63781
TFAP2C	0.235398	0.705109	0.527095	0.185188	0.771617	1.67435	0.126211	0.608946	0.162731	1.12852	0.790719	0.192541	0.279946	0.952813	0.787118	0.328105	0.977948	0.593268	2.1281	3.44799	0.467564	0.186892	0.259352	2.23095	0.191469	2.92423	0.363283	1.63348	1.78396	0.396667	0.634481	0.724079	0.343151	0.192712	0.365113	4.18694	0.229942	0.447878	0.150474	3.06932	0.299628	0.120873	1.35381	0.426123	1.1661	0.60863	0.274196	0.195806	0.591471
SP1	17.6989	15.4165	16.497	22.5152	15.8226	18.5287	7.25716	11.1951	16.9904	14.2901	13.6055	15.3274	11.3615	14.6553	15.6467	16.5948	14.3693	7.13432	11.6027	13.0791	15.628	15.8742	16.9476	12.7879	15.2751	15.3844	18.2671	14.2583	19.6381	14.8514	14.7457	18.5095	13.4574	15.7932	16.3287	14.489	13.2198	15.1816	14.1631	15.245	18.3298	13.9154	17.4079	17.7795	14.8671	14.0917	15.0291	17.2322	14.4267
HBA1	0.0770136	1.1659	0.250142	0.0666454	0	0.450517	0.211965	0.0267253	0.184938	0.205118	0.201207	0.24874	0.0335823	0.12469	0.62319	0.0823803	0	0.427011	0.225254	0.257746	0.140222	0.514331	1.17336	0.377589	0.535935	2.0763	0.0769049	0.0411089	0.0301414	0.161172	0.377071	0.24321	0.512046	0.253731	0.632652	0.835743	0.5149	0.489668	2.68829	2.46615	0.31214	0.2175	0.334956	0.283114	0.0822855	0.0903233	0.729358	0.26425	0
NNMT	2.67301	12.4119	8.47329	3.28543	3.72168	13.8539	22.5645	3.15737	6.36596	5.66216	18.4839	2.67843	3.20856	6.2955	4.63496	3.14992	9.18669	6.35177	5.34008	12.7185	2.20112	3.43487	7.12489	12.5067	6.35863	10.6502	4.29717	9.33704	3.27642	3.1812	5.46509	4.52714	20.5581	8.00332	6.61253	4.20482	5.23934	2.48046	2.40659	14.708	4.65118	2.61313	5.15666	23.5671	6.83396	15.1667	7.15505	1.66803	7.16557
PLIN4	0.716656	10.8614	4.42211	1.59139	3.4637	45.5433	0.737676	6.34523	0.405885	16.3872	7.74046	7.50083	0.402421	40.6795	36.2011	0.133793	19.6229	1.87808	13.5778	37.5845	0.759368	0.184951	21.017	16.717	0.702373	25.109	0.374701	14.3399	40.9413	5.69095	13.6106	5.62523	0.58305	0.777386	3.55026	62.7269	14.8562	6.57167	4.91017	21.9001	1.98044	0.127293	17.2943	5.29703	0.35035	7.78166	1.64687	1.19702	4.28978
HIC1	2.46397	0.880513	1.49627	1.29033	1.67615	2.40971	0.7609	1.24404	0.641207	3.6122	0.988699	0.894744	1.12746	3.05942	1.92537	1.85232	1.56512	0.683088	1.60934	2.77953	0.824929	1.57275	1.81532	1.69256	3.27742	1.65789	1.49425	2.08081	1.83763	1.15239	1.96536	1.53502	2.28302	1.72983	0.766807	2.92887	1.73095	1.64102	1.3982	0.520757	0.745194	1.72722	1.93174	2.2256	1.73155	1.66504	1.48016	2.06461	1.34704
STMN1	12.8729	15.421	11.3842	16.9349	13.5998	16.1211	20.2485	20.2341	15.855	21.4878	13.8348	8.23171	20.1766	14.2431	7.73697	17.2967	16.1293	31.6444	21.2765	14.479	21.8496	17.9558	16.6622	14.7308	13.89	18.1089	25.5454	14.6136	13.3458	9.43927	12.329	11.9919	13.9953	11.9293	9.89121	7.77263	8.06624	6.05157	11.4779	14.361	7.47801	10.5875	18.5387	16.4843	13.5493	12.4706	13.0458	14.0121	16.5309
RRM2	8.20215	11.2529	5.20942	20.1145	6.82866	15.9573	9.70041	8.84069	20.6988	11.3203	13.4077	6.19171	8.18883	5.90449	3.41786	12.5405	6.35544	10.4772	6.16359	8.99095	21.2786	10.4041	9.34278	12.2069	8.51962	6.08235	13.314	4.22926	4.49012	2.99926	4.30325	7.69637	9.62875	6.20845	5.1502	0.952718	2.68055	2.52709	8.92028	22.3963	3.82551	5.10689	8.53868	11.1759	6.2168	19.6998	7.0528	8.48157	5.56249
CAPG	48.273	27.1797	34.2907	17.0839	43.4908	23.1326	43.5759	52.6177	35.6292	49.7592	40.3609	40.9898	63.3859	30.8516	23.3263	42.7888	29.2572	55.464	39.302	37.8923	44.4517	32.1615	43.1763	45.6129	37.6089	26.7466	46.1768	36.0442	18.9702	31.9172	42.0691	31.9104	31.9422	37.199	31.377	9.9672	22.1344	35.2817	39.4342	58.611	55.5683	54.1284	30.9269	25.919	39.2871	64.1807	45.0381	43.1253	50.7769
HNF4A	61.2278	41.1958	59.2023	59.1097	58.785	22.9357	26.0728	32.544	60.2787	40.1863	16.6081	71.8584	42.0945	35.9801	35.3127	49.371	27.8129	20.002	19.1534	36.7844	59.9502	66.8128	42.1191	38.5424	51.9876	34.8072	47.0616	32.7555	21.3779	65.0502	48.5304	53.8682	54.2743	55.8368	57.5659	5.93483	45.8215	72.1652	62.1797	46.6164	62.0276	59.0359	43.4586	52.2531	46.2786	38.7209	65.5579	65.9279	41.0573
NGB	0.227553	1.25637	0.184774	0.187072	0.193727	1.44762	0.536822	1.67012	0.191253	2.57273	5.38879	0.370101	0.26791	2.19673	0.903933	0.0608524	3.04877	0.857951	2.59568	2.92115	0.132063	0.122745	0.496402	1.25072	0.395883	2.00433	0.204508	0.810778	2.85879	0.397981	0.454938	0.546659	0.26699	0.157437	0.431377	3.52975	0.994329	1.1665	0.248579	0.477619	0.201225	0.0321324	0.809751	0.250955	0.0850953	0.44035	0.0760602	0.14054	0.341813
YWHAE	105.584	100.832	102.226	126.004	93.9815	106.739	197.122	148.953	120.477	103.209	161.794	99.1788	129.637	102.472	83.3785	117.257	109.811	192.924	133.426	96.2964	137.002	127.979	105.658	112.85	102.528	101.005	115.183	126.829	91.1402	97.0072	99.3541	115.567	115.482	105.512	115.369	67.2247	88.2626	90.6156	119.172	135.512	109.657	125.927	87.6664	104.502	105.858	136.524	107.808	116.555	123.244
GABPB1	2.02546	2.0186	1.98312	1.53921	1.77784	2.16146	2.7363	2.28561	1.74493	2.226	2.49099	1.22723	2.22159	2.10213	1.71255	1.98866	2.32105	2.46095	2.80301	2.30735	2.07816	1.88197	1.98631	2.00668	1.80641	2.14081	2.52094	2.43408	2.74089	1.6576	1.68415	1.72693	2.02688	1.83089	2.13818	1.84489	1.57662	1.1129	1.52594	2.10883	1.40436	1.73466	2.33749	2.17563	2.28325	1.92634	1.93236	1.85536	2.34173
AURKA	5.78348	6.90403	6.00402	12.2777	6.45259	8.47147	8.8167	5.7542	11.4446	7.03109	5.45107	4.93505	6.38781	4.80045	3.0374	6.74249	5.06395	6.34037	5.66894	3.83268	9.50222	7.76817	6.03069	5.79205	6.48464	4.93969	7.65412	4.46073	3.1546	4.45181	4.30129	6.01928	5.16238	3.86876	5.09335	1.24775	2.6693	3.39797	6.81151	9.20189	3.82766	5.16194	5.87025	7.74409	5.28767	11.3594	6.57024	7.07361	4.37234
MIR4715	0	0	0	0	0	0	0	0	0	0	0	0	0	0	0	0	0	0	0	0	0	0	0	0	0.539489	0	0	0	0	0	0	0	0	0	0	0	0	0	0	0	0	0	0	0	0	0	0	0	0
RIPK1	15.1735	11.8972	15.1842	18.8697	16.0298	13.6311	11.1691	11.5718	15.6394	13.8322	11.8446	19.1484	14.2824	13.1284	13.3554	15.2988	12.8969	7.55076	12.2917	15.6598	13.0065	14.5815	12.6677	16.296	16.0617	12.6522	14.7221	11.7963	12.9201	15.3632	15.0982	15.5548	18.7544	15.1926	13.3115	8.69796	17.7176	19.557	15.3704	13.0878	19.3653	13.359	16.1175	13.4655	18.2042	14.8487	20.2999	15.9128	13.5644
PRDX1	120.402	119.11	108.425	162.072	83.1274	122.33	214.335	118.997	125.828	103.259	182.673	133.383	116.568	130.898	82.1946	158.501	148.784	144.137	132.893	96.7917	93.0359	159.71	91.6436	108.025	127.691	107.746	87.0272	110.725	105.964	123.374	98.5269	166.273	106.303	137.782	163.504	92.1461	198.657	118.415	161.65	127.203	175.948	148.281	113.8	102.81	79.6783	172.173	117.594	126.571	107.233
MIR30B	0	0	0	0	0	0	0	0	0	0	0	0.168586	0	0	0	0	0	0	0	0	0	0	0.253036	0	0	0	0	0	0	0	0	0	0	0	0	0	0	0	0	0	0	0	0	0	0	0	0	0	0
AKR1C1	0.366397	2.43309	0.44529	0.176383	2.17758	1.13378	0.864373	0.853824	0.617645	0.876335	0.855824	0.609611	0.612628	0.804387	0.864828	0.231005	1.25504	1.04133	1.62612	0.967539	0.863166	0.218768	0.564619	0.807725	0.33289	1.83619	1.18972	2.29448	1.59544	0.367797	0.754405	0.293924	0.401428	0.518032	0.413993	1.1919	0.526667	1.92657	0.473467	1.18707	0.871703	0.283248	2.30545	1.02135	1.38703	0.917777	0.263593	0.329699	0.936002
AKR1C2	0.920992	2.30102	1.99946	0.586681	0.765511	1.12593	1.3655	2.15066	0.495315	0.912196	1.30694	1.31247	1.97037	1.67755	1.2174	2.20637	1.53945	1.96106	2.09398	1.44714	1.22929	0.946276	1.3454	1.25019	1.81211	1.25072	0.779184	1.95622	1.56197	0.854723	1.84757	1.44776	1.21194	1.31066	2.53405	1.20644	2.42135	0.589652	1.59973	1.6135	2.24464	1.16505	0.800377	1.29315	1.00796	1.06891	0.790989	1.50325	3.19346
AKR1C3	33.5673	48.1179	41.6629	24.0351	22.629	10.5298	70.2355	31.5897	10.6734	7.36982	17.1828	25.4501	20.8878	17.7889	12.7689	36.4753	27.8155	38.8883	19.3455	8.36304	17.9067	32.2417	10.9698	8.41542	36.8465	23.0404	18.299	23.1578	8.81849	34.7748	27.2728	35.5589	30.9426	26.6611	40.7696	5.94793	67.5622	24.3072	39.9809	15.7241	37.6403	49.4134	16.841	23.2075	22.0832	17.8905	37.2007	27.5887	29.3104
RB1	7.68605	7.06739	7.02549	8.17879	5.54749	7.14221	12.4393	8.72875	7.4387	7.89039	11.1115	6.11795	7.67282	7.04208	6.49506	9.01705	8.27695	13.1933	11.723	8.44017	7.19093	7.73818	6.59822	6.95341	6.88449	7.56102	8.2269	9.42865	11.0684	7.45772	6.37409	9.75591	8.68383	7.33808	9.17581	4.59805	5.47594	6.12249	7.40307	7.13331	7.13631	6.31968	9.9784	8.4944	7.45483	7.93138	7.00343	7.83542	8.2843
HSF1	16.9803	16.1861	17.186	10.9089	15.5105	15.8692	14.0977	18.8844	10.9214	13.474	12.2968	11.6683	14.298	17.8579	15.2917	15.6404	14.8882	11.4977	13.193	14.4574	15.9374	14.2209	15.7637	13.3984	14.7767	14.3204	13.0279	13.9387	13.9285	15.0486	17.1359	13.5354	16.1462	15.6387	9.90051	14.5457	12.262	11.9258	13.4804	13.5808	10.0813	16.8064	13.2233	16.3888	15.3505	13.6536	15.509	15.0176	18.0027
GCLC	6.2004	4.85396	5.48518	5.36784	5.39339	5.0701	5.4584	4.90454	3.66153	5.60589	5.12466	3.67427	4.79448	5.87447	5.43321	5.15317	6.6529	3.91256	6.46736	5.17874	4.64511	5.09611	4.32819	5.58429	5.72592	5.57606	5.51886	6.49772	7.8719	5.00913	4.41689	5.21918	4.26753	4.41439	6.24685	5.1488	5.40139	3.97978	4.94795	5.10977	5.57989	4.4159	5.72938	4.19931	6.02406	4.32219	4.51879	5.98964	6.07831
SQSTM1	28.3136	23.1015	33.6153	31.5833	35.1243	29.5044	27.4448	28.5783	22.7176	35.3578	20.6176	45.9642	29.7008	36.2007	45.5042	39.2678	35.0003	19.7734	27.2553	36.2808	32.633	31.3332	33.4066	46.5626	37.1265	27.5598	26.5649	29.9713	26.8582	36.5019	38.6929	32.2806	33.2306	34.6909	26.4446	28.7413	33.298	41.9588	32.8277	17.7092	37.9034	41.1386	26.6022	27.2928	29.6713	27.8711	33.3133	35.3814	28.9865
NQO1	35.4469	25.7411	25.563	25.9204	26.0419	20.2383	112.249	22.59	38.4238	16.2536	14.6632	45.9747	35.9952	43.7072	20.1929	33.7948	27.1447	40.7762	21.0832	20.8481	31.0526	38.8938	24.6349	15.4925	32.9143	23.8443	16.3072	18.6873	20.8058	30.9948	28.087	42.0104	29.4401	26.5646	46.5925	8.38908	12.3208	39.4235	60.7848	36.3905	116.775	44.4139	22.5819	23.726	24.8102	21.9956	22.7232	50.7116	14.9139
MUC1	39.7717	84.651	33.2838	199.402	35.7704	80.762	3.67178	28.6598	112.415	41.3931	24.8763	71.6585	48.3068	26.752	29.2389	101.502	21.5363	9.29747	10.2377	25.8309	73.9729	30.4901	62.6049	48.966	92.9012	20.6228	40.3599	48.1124	14.4328	44.7319	34.2384	107.749	47.7897	42.2833	39.1971	8.51105	0.530607	69.7852	23.1469	38.7288	18.7012	40.8032	31.1723	103.754	38.9401	110.528	44.5393	33.8262	44.3533
MT1G	417.849	435.682	366.332	301.617	409.41	268.719	192.936	1196.65	286.06	241.906	713.473	892.131	394.783	84.3344	518.346	556.721	667.092	660.909	871.187	153.543	181.405	211.32	55.5492	383.765	269.043	211.212	344.567	692.057	164.062	686.403	422.534	464.995	155.631	429.531	349.522	5.44593	991.424	668.825	603.953	42.0154	715.756	856.833	289.248	8.37906	371.545	403.748	607.461	348.644	675.401
CISD1	10.2038	9.88847	9.58929	9.88837	9.26564	9.1017	22.3638	14.7235	12.3416	9.34599	13.9873	8.12139	12.0724	11.4156	9.85193	9.10907	14.4473	18.4788	19.2317	10.5301	11.9565	12.1124	10.5529	8.14891	8.59254	14.4725	8.91571	10.0263	15.8302	10.4775	9.52656	9.08829	10.4493	8.88396	12.872	12.8092	22.9493	7.89505	12.7745	12.0835	8.60026	10.6511	10.9554	9.75691	9.61164	11.3843	10.4263	10.2305	11.189
FANCD2	1.53001	1.72706	1.36911	2.78754	1.66057	1.71185	1.50294	1.26521	2.50675	1.90326	1.01986	0.860597	1.39905	1.03769	0.765092	1.84462	0.984542	1.16326	0.928872	1.60553	2.7252	1.68768	1.77011	1.56869	1.72198	1.22461	2.6418	0.975123	1.00937	0.894958	0.956229	1.26566	1.84021	1.33522	0.776047	0.240086	0.734945	0.687311	1.3223	2.50542	0.899352	0.948983	1.73898	1.71417	1.27936	2.12	1.61847	1.90502	1.14683
FTMT	0	0.0434329	0.0198017	0	0	0.0267478	0	0	0.02928	0.019485	0	0	0	0	0.0269089	0.0260855	0	0	0	0	0	0	0.0506648	0	0	0	0	0	0	0	0	0	0	0	0.0462295	0	0	0	0	0	0	0	0	0	0	0.0214505	0	0.0334696	0
HSPA5	139.643	108.173	98.867	219.781	115.336	180.667	169.453	88.012	125.735	137.742	194.502	98.09	74.9895	150.8	146.19	131.303	131.725	62.1263	81.0968	145.769	207.14	150.221	164.109	229.96	149.387	107.942	170.82	112.012	85.6732	101.096	124.274	161.333	182.721	121.683	155.493	82.5091	70.8187	104.546	115.415	209.279	105.727	106.255	94.2486	131.977	137.165	317.273	155.453	105.183	105.323
HELLS	1.1005	1.57819	0.655201	1.70544	0.833563	1.1283	0.682687	0.525565	1.5141	1.00084	0.735549	0.605235	0.613437	0.815655	0.582699	1.13878	0.608792	0.512977	0.423974	1.02404	1.57924	1.18171	1.2595	1.03672	1.05625	0.943145	1.43854	0.48032	0.696908	0.405426	0.525722	0.967715	1.34823	0.858764	0.832897	0.266977	0.407027	0.312255	0.956404	1.90302	0.775176	0.560752	1.25527	1.32783	0.81699	1.30617	1.1632	1.13789	0.512743
SCD	7.29173	14.8951	7.41739	3.3107	10.8509	145.51	9.50166	5.31047	53.0919	12.2434	27.215	27.0842	7.92288	57.1214	32.3121	14.505	6.48338	7.15946	11.3345	23.4289	36.8486	6.62012	50.2901	14.0564	21.3575	9.92145	9.63673	28.4844	18.1931	8.84188	4.88025	19.175	9.93449	5.5291	7.4951	19.7363	8.86595	5.80482	14.9142	32.4403	15.1834	4.67786	7.16978	66.1871	13.2069	14.0973	9.18324	7.82406	8.37336
FADS2	1.88382	1.67412	0.640914	0.519847	0.679564	2.74861	0.717758	0.852066	0.739949	4.21737	2.22684	0.710427	0.546786	1.54862	1.63893	1.71979	3.83436	1.65353	3.1878	3.23739	2.48353	0.485381	1.7691	2.83992	1.31229	1.69947	1.12792	1.20792	1.88315	0.810799	0.810662	1.62739	0.723082	1.02865	0.600728	4.33543	0.988761	0.709205	0.744035	1.32303	1.23134	0.797941	1.62574	2.73184	0.704158	1.8554	1.3305	1.02326	0.703198
SRC	21.7072	18.8822	20.8664	23.3849	21.6189	18.6295	12.2473	15.5671	17.4884	16.1184	13.0396	23.9598	18.0092	17.6465	15.0665	20.7029	15.5408	10.6099	11.3774	13.8801	18.0412	18.5329	18.7419	16.0065	20.7892	15.1757	19.4493	16.4969	14.0315	20.581	21.5593	22.8844	14.6517	19.2168	16.1085	11.0589	21.7886	27.0533	21.5421	15.6404	17.9026	19.9327	17.6505	19.5081	20.7251	18.9833	19.9449	21.1688	20.6096
STAT3	26.3297	28.9061	25.599	56.9729	26.1133	41.5611	20.3692	20.0137	26.2278	22.8941	37.7639	26.1811	19.5862	24.4577	33.7293	30.8056	26.9939	10.6901	18.2948	26.9337	30.5337	24.3851	29.244	35.2482	33.6768	20.7417	29.6666	26.6346	24.4855	22.965	23.6692	45.7147	39.0243	26.9055	26.4879	23.1289	24.5503	24.6942	23.3348	27.0977	22.9656	19.5654	22.3157	36.8313	22.3336	36.0538	25.2421	24.0446	24.8996
PML	4.70811	6.49564	3.8904	6.13631	3.16013	7.79625	1.91375	3.47861	2.64956	3.49258	5.0858	2.7076	2.97538	4.89858	4.08511	5.92206	5.31645	1.62638	2.97577	3.95583	2.55203	3.54711	4.46329	2.80304	6.47527	3.55763	3.94551	3.68563	5.04077	4.30474	3.46189	4.38713	4.82662	4.20595	3.3229	7.08811	3.55336	4.23184	3.84173	3.81446	2.77434	4.07345	3.36484	5.19854	3.30233	4.17113	3.48139	3.77132	3.63072
MTOR	7.37568	6.24531	6.67992	6.96128	7.67617	6.92206	3.49462	3.81349	7.03796	5.9682	3.60244	4.57712	3.18845	5.95154	7.15306	5.82926	5.46429	1.94572	3.6569	8.40877	6.94892	6.25198	7.74087	6.20274	6.09806	5.13634	7.99052	6.28936	6.4026	5.73323	5.42698	6.34618	6.64094	5.06281	5.05306	6.88453	4.61956	4.38456	5.87651	7.74198	4.75684	4.29258	6.33189	8.04157	6.25721	5.95724	6.12789	6.63578	4.91204
NFS1	4.6045	4.18597	4.61437	4.27097	3.94535	3.06772	4.41552	4.78616	4.24253	3.22985	2.75312	3.25082	3.9241	5.01657	3.41601	3.70734	4.0801	3.07783	3.31353	3.53951	4.10354	4.98225	3.811	2.87861	3.95137	4.02921	3.95129	4.25941	3.80613	4.1617	3.87644	4.0984	4.484	4.5651	4.75568	3.02217	3.747	2.97232	4.43134	4.07909	3.79564	4.50212	3.72698	4.24151	4.50908	3.48054	4.82594	5.15481	4.54545
TP63	0.0690168	0.0512175	0.0233508	0.0174198	0.0547251	0.116705	0.0373125	0.0359254	0.034528	0.114887	0.135236	0.0437862	0.0376191	0.0593635	0.0761564	0.0707501	0.143363	0.0350782	0.14509	0.27223	0.00981736	0.0354557	0.0896184	0.104631	0.0600357	0.0669089	0.106251	0.0690756	0.182328	0.0257922	0.0187732	0.0369746	0.367776	0.0776897	0.0327092	0.0881132	0.0432594	0.0411396	0.0411634	0.125361	0.146222	0.0189501	0.129621	0.0370002	0.0307255	0.177066	0.115345	0.0355216	0.0172786
CDKN1A	81.764	80.517	89.1686	162.811	121.299	49.8749	111.359	87.609	147.968	111.968	107.619	220.228	91.9753	70.2018	90.4937	116.255	55.4023	68.9494	59.7484	94.9228	121.467	77.7264	59.5738	138.879	139.317	99.5764	86.9894	68.1005	35.5406	95.3965	151.652	143.607	100.297	118.39	115.432	28.2368	178.798	166.007	115.442	97.6202	150.54	147.056	91.9761	74.466	96.3194	189.032	105.94	124.725	56.7289
ENPP2	7.94791	5.51472	9.73106	3.88415	6.12595	6.27878	5.73397	4.59976	8.67468	6.68141	5.10055	3.51432	4.5006	8.07294	6.98093	5.20328	10.1589	3.65615	5.77551	7.6441	4.13689	9.05553	6.00939	4.86305	6.93542	11.2694	6.26346	5.87403	8.65865	6.05709	4.93381	5.41297	5.49057	8.4402	7.60901	6.09432	4.20558	4.11415	3.90227	6.05619	3.73601	6.17459	8.54341	14.6469	8.3286	9.25797	6.43922	10.7619	6.92879
FH	49.2955	45.6633	52.1928	65.5992	50.5166	36.9903	76.6321	51.0905	63.0933	51.326	53.3582	37.8854	46.3819	52.5929	41.7846	55.075	52.7268	47.4629	50.0731	51.2424	69.079	61.7533	49.545	57.0875	51.1754	44.6051	52.1639	52.4184	41.2183	41.5925	48.2048	54.3389	59.8234	46.6724	54.826	36.2012	46.5526	34.5261	64.9506	61.5676	45.2204	58.0221	40.8576	50.887	47.0459	61.8641	55.3337	59.8834	41.0797
CISD2	10.5163	8.88905	9.98142	11.5553	8.46593	10.4705	19.4554	12.9682	14.2162	8.94799	19.5084	7.82466	15.4135	10.8729	8.13834	10.308	11.8745	19.0928	14.3302	10.0834	10.5712	11.9053	9.6773	9.51596	9.91515	10.3488	11.6674	11.679	9.8085	10.4498	9.37329	10.8612	11.6153	10.359	11.2228	4.897	8.99981	8.20125	10.2457	11.855	8.32525	10.1554	10.3675	11.8638	9.17166	14.5372	10.6841	11.2003	13.3785
MIR9-1	0	0	0	0	0	0	0	0	0	0	0	0	0	0	0	0	0	0	0	0	0	0	0	0	0	0	0	0	0	0	0	0	0	0	0	0	0	0	0	0	0	0	0	0	0	0	0	0	0
ISCU	15.5249	17.3085	18.4448	13.3847	16.6475	23.0929	21.3712	27.3881	14.895	18.4315	24.8986	12.9272	21.4336	20.2475	19.2836	17.1078	25.8341	23.7328	30.0202	18.6696	15.2259	14.8583	14.6675	16.0371	16.562	22.4226	18.1599	24.3004	24.7202	16.2934	16.0221	15.4109	16.9521	16.8512	17.1917	25.6249	22.2006	13.3942	15.1232	15.8271	13.5258	19.4836	20.4486	17.5254	18.2129	18.0522	17.2423	16.3171	22.8982
ACSL3	10.2855	11.738	10.1622	13.077	12.4369	16.3215	7.93104	10.5352	22.8435	12.5285	15.9289	10.2865	10.163	10.8503	13.767	11.1796	11.9234	8.73328	13.2167	13.1963	20.4374	14.5034	14.9658	12.0834	12.312	12.7407	12.985	17.182	12.8934	10.3218	9.98536	14.4035	13.3395	8.976	12.8418	6.87186	6.71677	8.43348	11.3267	17.0607	9.14388	7.84589	13.3593	17.779	11.6444	15.2533	10.4034	11.1482	13.7192
OTUB1	18.2137	17.4682	14.9266	17.7362	19.3853	15.5714	23.1331	23.1604	16.5777	17.3456	21.3248	17.3156	21.1886	15.7219	13.4488	19.44	16.4345	21.5697	16.2056	13.4079	20.6206	16.1062	15.3901	16.2831	18.5183	14.1135	18.3284	17.713	11.6454	18.2383	19.2588	17.4498	17.199	18.3834	14.949	10.1624	16.1521	18.1251	16.2762	16.4613	16.0656	22.5276	13.5279	15.3288	18.3446	22.3991	17.6403	17.3233	19.6813
CD44	16.1794	12.2804	15.5954	11.4651	9.61294	19.5137	12.0124	13.8105	10.5052	16.4206	18.4047	6.79453	11.1306	15.3297	16.1104	15.2322	15.0022	9.87966	11.3522	18.6255	12.1559	13.0935	17.188	18.8776	15.3091	15.548	15.0647	13.5195	19.4598	11.749	11.3105	13.2855	14.5696	14.7662	12.6348	10.888	8.5852	7.57718	9.39687	15.3361	8.42033	10.2812	17.1033	17.5923	13.4907	21.8266	12.9964	11.2332	15.9031
LINC00336	0.0712142	0.0905969	0.0908699	0.00880381	0.081517	0.0446347	0.120002	0.0953207	0.122151	0.00812877	0.0455645	0.0492876	0.0931603	0.148244	0.0673552	0.0979414	0	0.0112816	0	0.00729603	0.0833548	0.0391978	0.0211364	0.023627	0.0303414	0.0901736	0.121909	0.0570199	0.011945	0.045623	0.083018	0.0481918	0.0954931	0.0670354	0.115716	0	0.0437258	0.0808561	0.107303	0.0246386	0.0674729	0.0383088	0.024135	0.121547	0.130438	0.0178975	0.0425063	0.0349072	0.0244509
BRD4	8.56674	8.33131	7.94218	7.20173	8.61409	8.40871	3.88266	5.54708	6.81046	7.46249	4.21553	6.9792	5.05498	7.17184	9.10675	7.97677	5.19712	2.58086	4.06915	7.76327	8.29999	7.19834	9.69827	8.15912	7.92091	6.12541	9.21842	6.02329	6.48088	7.39896	7.27274	7.50176	10.5277	8.29031	6.54244	6.99947	6.80203	6.60295	6.6757	8.36249	7.25738	6.48442	7.34422	8.95158	7.4089	6.38478	8.55394	7.89807	6.22621
PRDX6	193.77	137.363	233.15	163.389	259.702	83.4668	137.007	222.119	373.02	231.367	126.384	277.018	261.387	166.072	140.149	170.298	149.592	179.658	178.412	135.965	262.064	219.597	162.145	190.87	151.131	202.658	201.075	152.045	132.273	235.962	267.958	175.754	172.515	220.255	159.625	82.9839	50.9564	358.476	236.239	159.272	285.892	291.374	269.859	124.126	262.981	128.329	233.078	265.853	194.406
NF2	5.56963	5.66007	5.28241	4.60507	5.1982	5.58108	2.69417	3.77218	4.79207	4.93754	3.20015	3.90235	3.70363	4.85732	4.55244	4.99517	4.13126	1.893	2.66587	5.04277	7.33419	4.99915	5.54661	5.14253	5.13872	3.80588	5.07217	3.71745	3.62603	4.37334	5.12071	4.92223	5.5773	5.32274	3.58184	3.97329	4.76713	3.44529	5.20058	4.29596	3.48639	4.50864	4.15613	5.72316	4.4464	4.45998	5.5835	4.68173	3.95906
ARNTL	1.97591	3.17295	3.71353	4.31335	2.53446	1.62195	2.25552	3.278	1.68367	0.695176	3.50061	2.44392	1.39664	1.63698	1.58249	3.36472	1.33062	2.71772	1.23042	1.07879	0.972668	2.56143	1.78773	0.868436	2.20829	2.22453	1.27935	1.38559	2.43598	1.83509	0.975239	3.61241	1.72755	1.68417	3.27454	0.381446	1.55925	3.17881	2.30015	1.99133	1.80014	2.15412	2.72558	2.02389	1.66851	1.67637	1.6032	1.90708	1.7502
JUN	56.8887	141.462	79.196	30.675	96.4674	50.5162	19.9275	54.0871	23.1126	96.0726	34.3135	85.778	49.5474	160.491	62.2192	37.1142	39.4605	18.7074	82.4009	64.674	64.9553	72.5016	63.5558	58.8104	101.029	59.1053	54.6982	96.7866	32.6403	57.5137	63.3118	50.5242	40.6813	59.8889	73.7986	33.5413	38.3312	49.0927	55.5729	48.0763	59.4699	93.9698	157.096	101.583	77.1579	35.0096	56.1096	87.0543	44.387
CA9	0.757301	0.731545	0.385636	0.522055	0.51424	0.844719	0.575332	0.748309	0.893866	0.851238	0.704224	0.186555	0.268659	0.763729	0.552373	0.508012	0.899857	0.441245	1.08403	0.911318	0.990321	0.929752	0.413343	0.804861	0.72734	0.938601	0.294802	0.524139	0.904242	0.276295	0.429442	0.677513	0.572287	0.202985	0.267661	1.31507	3.9445	0.275438	0.541525	0.673529	0.184446	0.374583	0.395857	0.578024	0.246857	0.587102	0.31105	0.352333	0.462737
TMBIM4	11.8654	11.8076	13.7411	13.8999	11.4224	9.86601	30.9744	21.3717	22.1537	13.3599	20.4854	13.8781	18.8636	11.5454	10.4	13.7287	13.0205	28.5163	28.7109	9.41984	16.8044	14.5455	12.342	10.806	9.56546	19.2774	13.4992	18.03	13.4145	13.1609	11.0524	13.0401	13.5996	14.5682	15.5785	6.46952	9.0267	17.3329	12.4992	12.4147	15.8477	14.4868	16.2686	10.2286	11.8417	12.9574	11.7899	11.5951	18.8414
PLIN2	16.85	7.33	21.0128	8.33748	7.83051	7.96501	17.698	10.5479	8.6887	8.89368	7.35701	12.922	12.8352	14.3145	5.23191	13.6782	13.6507	9.33332	8.88013	7.97049	7.12218	29.642	6.34829	8.54499	7.57533	22.2785	8.80029	7.61637	7.84832	15.2753	9.50258	8.51919	11.3736	16.1294	20.7333	6.37215	64.1132	11.151	14.9965	4.7089	17.3258	10.772	11.1733	8.3355	10.4247	11.1847	14.0135	9.65716	10.803
MIR212	0	0	0	0	0	0	0	0	0	0	0	0	0	0	0	0	0	0	0	0	0	0	0	0	0	0	0	0	0	0	0	0	0	0	0	0	0	0	0	0	0	0	0	0	0	0	0	0	0
AIFM2	9.56351	7.52398	7.4809	9.39944	8.42057	6.40095	10.3255	6.33616	9.14208	6.50404	4.5338	9.92696	6.3673	10.6752	5.94201	9.02432	6.75048	4.44854	4.79832	6.72688	9.51108	6.7069	8.5166	8.68966	9.3041	4.76839	5.47323	5.65526	4.5925	8.86209	8.84303	10.5198	8.30186	9.90494	13.3975	3.70127	5.40641	11.4759	13.3155	11.8587	10.0499	8.01271	5.81806	5.16765	7.29678	9.97644	8.17995	11.9971	5.12672
LAMP2	22.894	16.3771	24.9022	20.9094	18.3808	23.0646	28.1303	21.4838	24.3958	20.6606	21.2865	19.4532	21.8606	22.2515	19.3341	20.9582	23.4174	25.8307	28.1441	21.9575	18.7913	24.9712	18.7816	20.3207	19.0346	21.7596	22.0715	26.9464	27.3952	22.9934	20.5212	22.3807	23.2753	23.5202	26.6199	15.0315	31.3214	21.1614	25.0389	17.5926	21.709	20.2266	22.7299	25.0189	20.3125	21.0455	21.199	23.5129	26.2484
ZFP36	50.5386	261.782	100.711	61.3891	267.728	92.092	59.4119	69.7558	62.5887	151.249	96.1358	135.587	49.8325	242.835	101.201	97.4205	83.304	29.1156	100.044	283.294	57.3414	91.3582	107.702	172.05	123.841	151.087	66.4094	172.62	50.2234	56.9114	104.038	68.4872	225.491	69.5607	169.639	40.2124	156.896	68.2218	73.876	300.771	131.627	110.082	321.445	179.583	131.036	137.838	114.13	76.9671	45.1359
PROM2	15.7646	14.9738	12.3875	14.404	13.3923	7.57342	11.0887	10.096	9.35588	6.62155	8.01225	6.10257	9.86045	13.3559	5.09495	12.7031	6.55446	6.08861	4.7425	8.78804	18.2059	13.1234	13.6659	8.93883	13.6442	6.89804	13.7617	11.1872	5.68699	11.815	11.3295	14.2019	17.3187	10.1804	10.9582	1.45905	2.22867	5.59449	17.3849	8.628	8.63669	13.1333	6.39114	18.8162	14.0862	13.3039	13.7643	15.1709	12.4738
CHMP5	37.3551	26.301	36.9599	39.5053	35.0699	29.8565	78.3074	61.2513	47.6838	39.4645	62.5937	54.5253	63.2512	34.5349	25.2364	43.3352	43.6506	116.454	75.1068	30.3081	33.3009	45.179	25.556	30.2511	36.2891	45.9487	42.0133	47.9989	38.1523	40.2127	37.1794	40.2701	25.0347	41.4807	50.8202	17.6737	49.4317	57.1538	45.4133	34.4859	50.551	48.4553	45.3948	28.4455	42.0683	40.7788	37.2108	44.7636	53.2209
CHMP6	14.1486	16.1687	12.8694	15.7821	15.0226	12.6659	24.6158	20.9775	12.3218	15.3483	16.284	14.4503	17.966	11.6381	13.4346	16.228	12.5348	16.6886	14.9191	12.4114	20.1155	12.252	12.8367	15.5129	16.9633	13.4782	16.827	14.2701	9.62518	15.1589	18.2517	14.492	19.32	15.9316	11.8185	11.0474	13.1511	14.4142	14.0218	12.2798	11.3101	17.8163	10.8403	15.44	14.9982	19.8253	16.4829	14.4043	16.2605
CAV1	15.8429	50.2424	25.5926	10.6017	17.8667	89.3397	31.7448	40.389	18.6566	67.4351	58.6975	13.9124	14.9068	55.8842	120.663	8.55491	107.457	32.8137	127.662	93.031	10.0643	12.9894	54.3478	60.2784	15.9693	102.154	11.7514	49.0083	170.27	25.0799	28.2904	18.4928	24.14	12.2732	19.4219	187.595	28.5133	27.5579	14.8435	51.8881	13.1764	8.34948	56.5331	20.3515	12.8485	28.8275	10.1058	9.73693	39.4399
GCH1	7.8449	7.32243	8.91815	16.689	8.73041	11.4888	11.0099	9.9063	13.6143	8.10225	18.6657	10.2507	9.74934	7.41799	5.84309	12.1911	6.31455	9.57739	9.57643	9.08507	9.33889	8.77113	8.11911	11.4263	11.6262	6.49468	10.2565	9.70107	4.92956	8.03941	7.84201	12.4559	14.659	9.26627	12.8338	1.78749	13.4558	7.63202	9.27572	9.98044	11.4336	7.26203	8.70228	10.3407	9.28996	9.92267	9.43864	10.119	9.69782
[truncated: 646 more columns]
